# Supplementary material for: A new imidazole based phenanthridine probe for ratiometric fluorescence monitoring of methanol in biodiesel
Source: Royal Society of Chemistry journal article supplement (doi:10.1039/d0nj06252a), 2021-01-01
Supplement: d0nj06252a1.pdf [file d0nj06252a1.pdf]

## Supporting Information

### **A new imidazole based phenanthridine probe for ratiometric fluorescent monitoring of methanol in biodiesel**

Sathish Sawminathan<sup>a</sup> and Sathiyarayanan Kulathu Iyer<sup>a\*</sup>

<sup>a</sup>Department of Chemistry, School of Advanced Sciences and Vellore Institute of Technology, Vellore-632014, India.

E-Mail: [sathiya\\_kuna@hotmail.com](mailto:sathiya_kuna@hotmail.com)

## Table of contents

| Figure | Title                                                                                                   |
|--------|---------------------------------------------------------------------------------------------------------|
| S1     | <b><sup>1</sup> H NMR for Compound 3</b>                                                                |
| S2     | <b><sup>13</sup> C NMR for Compound 3</b>                                                               |
| S3     | <b><sup>1</sup> H NMR for Compound 7</b>                                                                |
| S4     | <b><sup>13</sup> C NMR for Compound 7</b>                                                               |
| S5     | <b><sup>1</sup> H NMR for Compound 9a</b>                                                               |
| S6     | <b><sup>13</sup> C NMR for Compound 9a</b>                                                              |
| S7     | <b><sup>1</sup> H NMR for Compound 9b</b>                                                               |
| S8     | <b><sup>13</sup> C NMR for Compound 9b</b>                                                              |
| S9     | <b><sup>1</sup> H NMR for Compound 9c</b>                                                               |
| S10    | <b><sup>13</sup> C NMR for Compound 9c</b>                                                              |
| S11    | <b>ESI-MS of 7</b>                                                                                      |
| S12    | <b>ESI-MS of 9a</b>                                                                                     |
| S13    | <b>ESI-MS of 9b</b>                                                                                     |
| S14    | <b>ESI-MS of 9c</b>                                                                                     |
| S15    | <b>Absorbance Spectra of 7,9a-c</b>                                                                     |
| S16    | <b>Absorption spectra of 7, 9a-c in different solvent</b>                                               |
| S17    | <b>Absorption spectra of 7 in the presence of various metal ions</b>                                    |
| S18    | <b>Determination of LOD of probes towards methanol</b>                                                  |
| S19    | <b>LOD Calculation plot</b>                                                                             |
| S20    | <b>FTIR spectra of Probe 9a and 9a+MeOH</b>                                                             |
| S21    | <b>Optimized structure of 7, 9a-c, 7+MeOH and 9a+ MeOH</b>                                              |
| S22    | <b>Theoretically calculated absorption spectra of fluorophore compound 7, 9a-c, 7+MeOH and 9a+MeOH.</b> |

---

| <b>Table</b> | <b>Title</b>                                                                                                                                                                           |
|--------------|----------------------------------------------------------------------------------------------------------------------------------------------------------------------------------------|
| <b>S1</b>    | <b>Major transition achieved from TD-DFT calculation with B3LYP/6-31G** level of theory</b>                                                                                            |
| <b>S2</b>    | <b>Density surfaces of the frontier orbitals involved in electronic transitions of chromophores 7, 9a-c , 7+MeOH and 9a+MeOH which is derived from B3LYP/6-31+G** level of theory.</b> |
| <b>S3</b>    | <b>Cartesian coordinates (in Angstroms) of the optimized geometries in ground state of 7, 9a-c, 7+MeOH and 9a+MeOH in acetonitrile solvent method at B3LYP/6-31+G** level</b>          |
| <b>S4</b>    | <b>Comparison table of imidazole based probes for detection of methanol.</b>                                                                                                           |

---

# PHE-4NH2

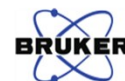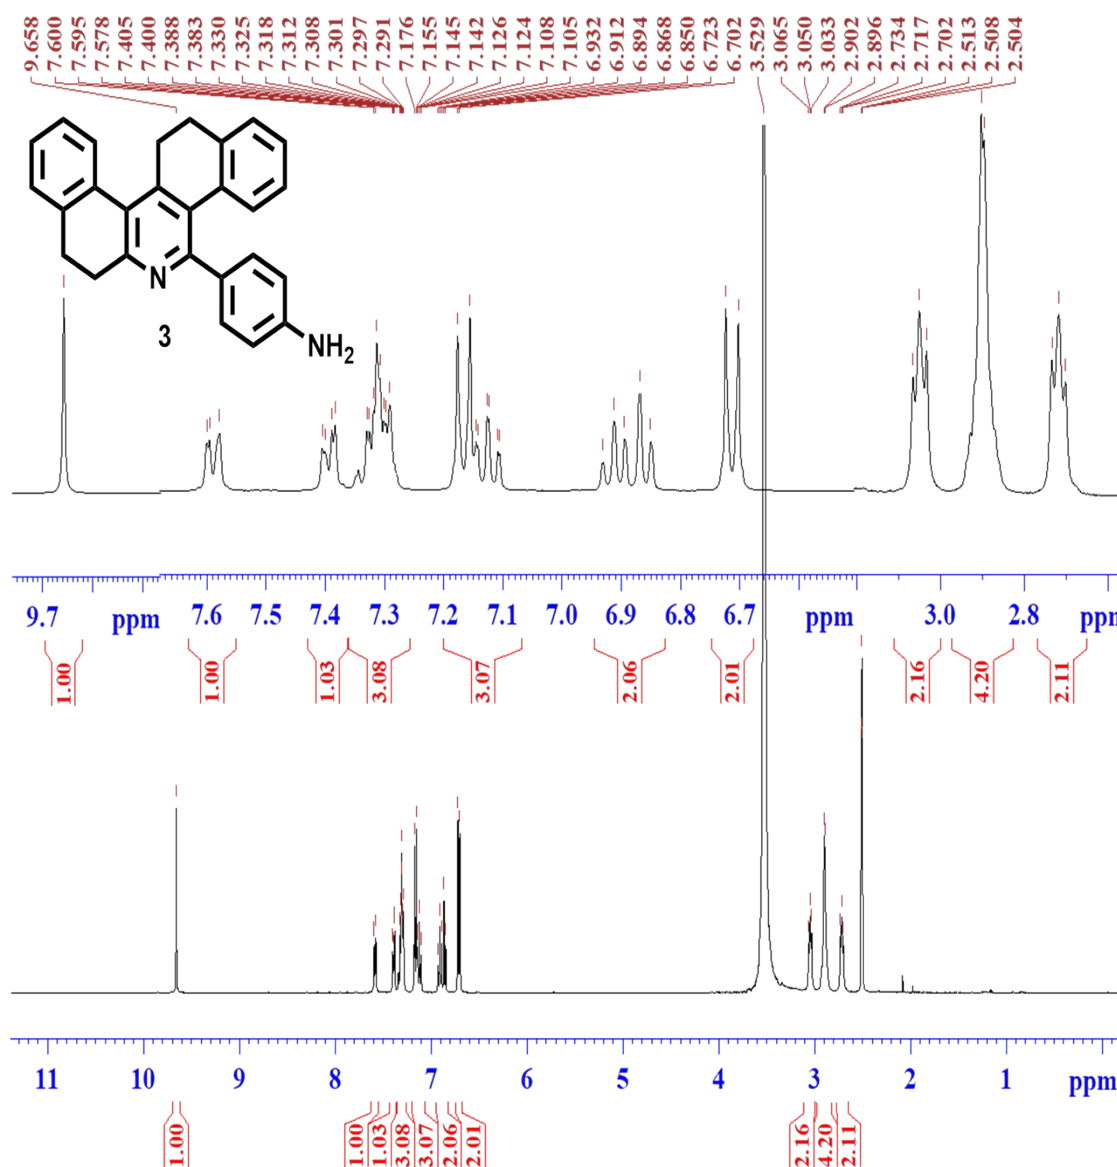

Current Data Parameters  
 NAME 4NH2-BEN-PHE  
 EXPNO 41  
 PROCNO 1

F2 - Acquisition Parameters  
 Date\_ 20180320  
 Time 6.36 h  
 INSTRUM spect  
 PROBHD Z108618\_0505 ( )  
 PULPROG zg30  
 TD 65536  
 SOLVENT DMSO  
 NS 16  
 DS 2  
 SWH 8012.820 Hz  
 FIDRES 0.244532 Hz  
 AQ 4.0894465 sec  
 RG 35.49  
 DW 62.400 usec  
 DE 6.50 usec  
 TE 300.5 K  
 D1 1.00000000 sec  
 TD0 1  
 SFO1 400.2604716 MHz  
 NUC1 1H  
 P1 14.25 usec  
 PLW1 14.00000000 W

F2 - Processing parameters  
 SI 65536  
 SF 400.2580000 MHz  
 WDW EM  
 SSB 0  
 LB 0.30 Hz  
 GB 0  
 PC 1.00

Figure-S1. <sup>1</sup>H NMR (400 MHz, DMSO) spectra of compound 3



# 4NH2-BEN-PHE

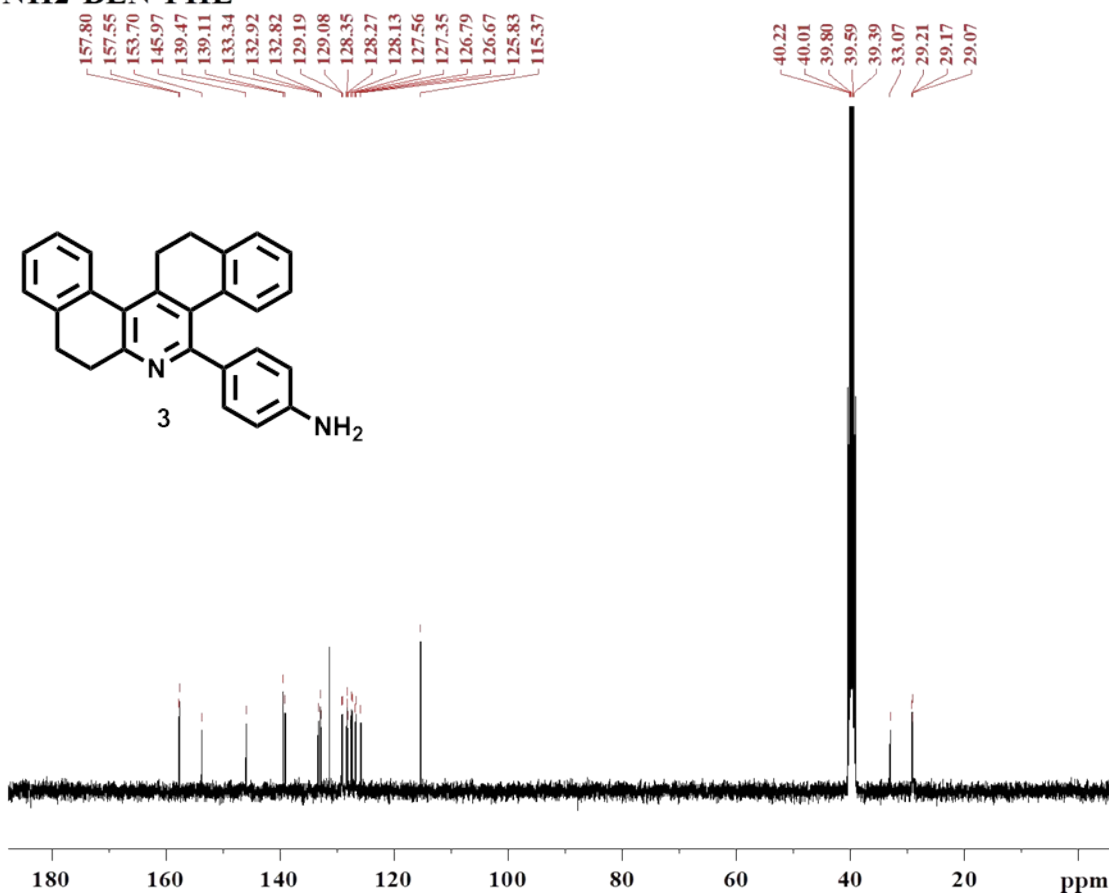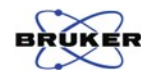

Current Data Parameters  
 NAME 4NH2-BEN-PHE  
 EXPNO 42  
 PROCNO 1

F2 - Acquisition Parameters  
 Date\_ 20180320  
 Time 7.07 h  
 INSTRUM spect  
 PROBHD Z108618\_0505 (zpgg30)  
 PULPROG zpgg30  
 TD 65536  
 SOLVENT DMSO  
 NS 512  
 DS 4  
 SWH 24038.461 Hz  
 FIDRES 0.733596 Hz  
 AQ 1.3631488 sec  
 RG 127.79  
 DW 20.800 usec  
 DE 6.50 usec  
 TE 300.8 K  
 D1 2.00000000 sec  
 D11 0.03000000 sec  
 TD0 1  
 SFO1 100.6550186 MHz  
 NUC1 13C  
 P1 9.80 usec  
 PLW1 58.0000000 W  
 SFO2 400.2596010 MHz  
 NUC2 1H  
 CPDPRG2 waltz16  
 PCPD2 90.00 usec  
 PLW2 14.0000000 W  
 PLW12 0.35097000 W  
 PLW13 0.17654000 W

F2 - Processing parameters  
 SI 32768  
 SF 100.6449542 MHz  
 WDW EM  
 SSB 0  
 LB 1.00 Hz  
 GB 0  
 PC 1.40

Figure-S2. <sup>13</sup>C NMR (100 MHz, DMSO) spectra of compound 3

PQAPA\_1H NMR

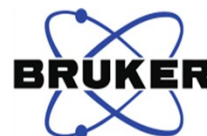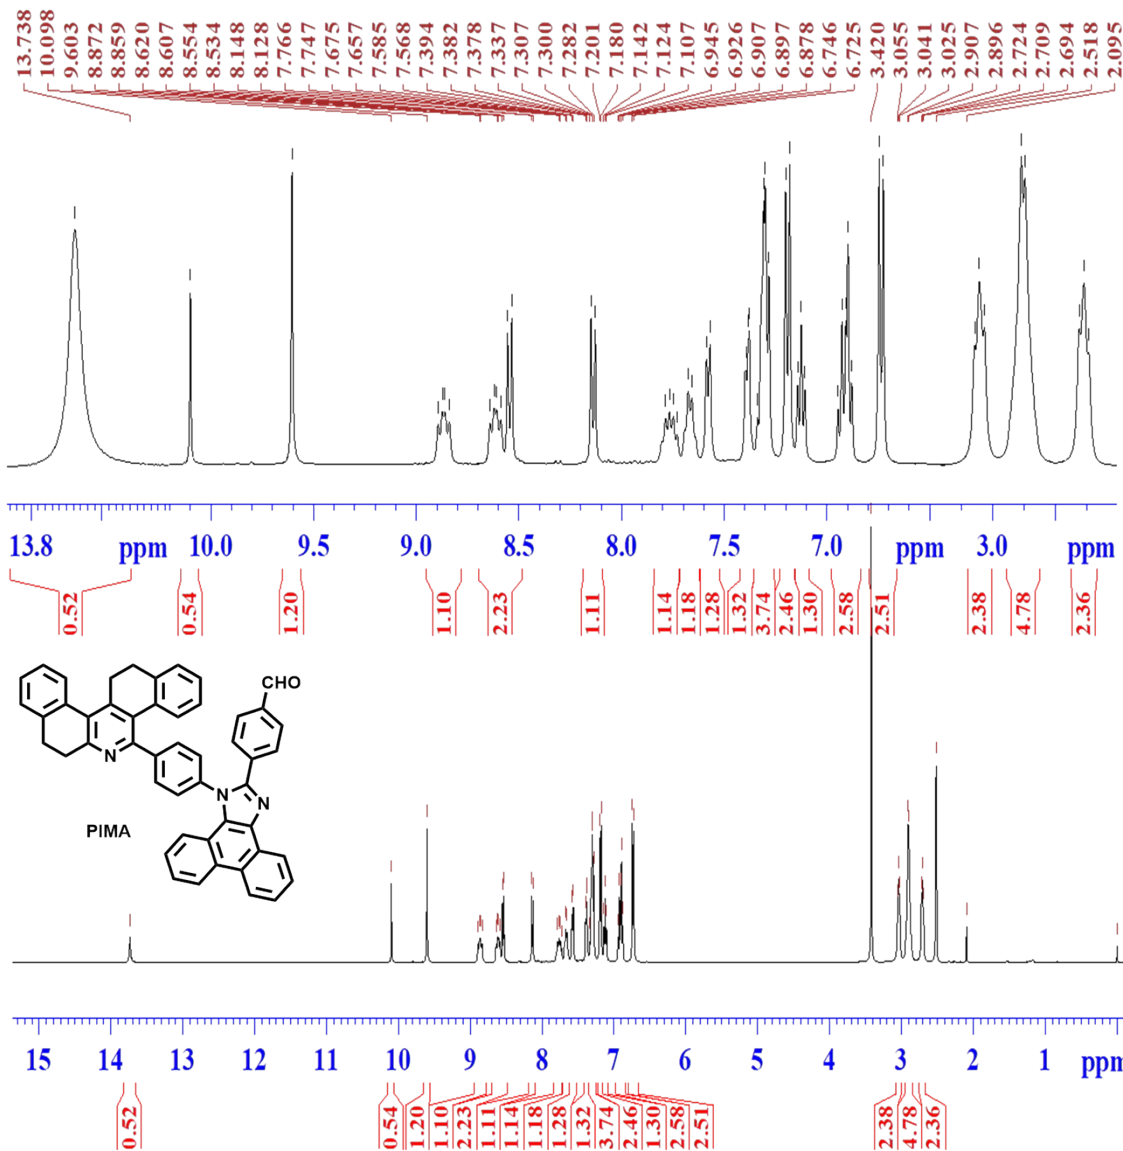

Current Data Parameters  
 NAME Dr.SYN091018  
 EXPNO 25  
 PROCNO 1

F2 - Acquisition Parameters  
 Date\_ 20181006  
 Time 15.06 h  
 INSTRUM spect  
 PROBHD Z108618\_0505 (zg30)  
 PULPROG zg30  
 TD 65536  
 SOLVENT DMSO  
 NS 16  
 DS 2  
 SWH 8012.820 Hz  
 FIDRES 0.244532 Hz  
 AQ 4.0894465 sec  
 RG 71.13  
 DW 62.400 usec  
 DE 6.50 usec  
 TE 297.5 K  
 D1 1.00000000 sec  
 TD0 1  
 SFO1 400.2604716 MHz  
 NUC1 1H  
 P1 14.27 usec  
 PLW1 15.00000000 W

F2 - Processing parameters  
 SI 65536  
 SF 400.2579959 MHz  
 WDW EM  
 SSB 0  
 LB 0.30 Hz  
 GB 0  
 PC 1.00

Figure-S3. <sup>1</sup>H NMR (400 MHz, DMSO) spectra of compound 7

# PQAPA 13C NMR

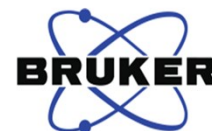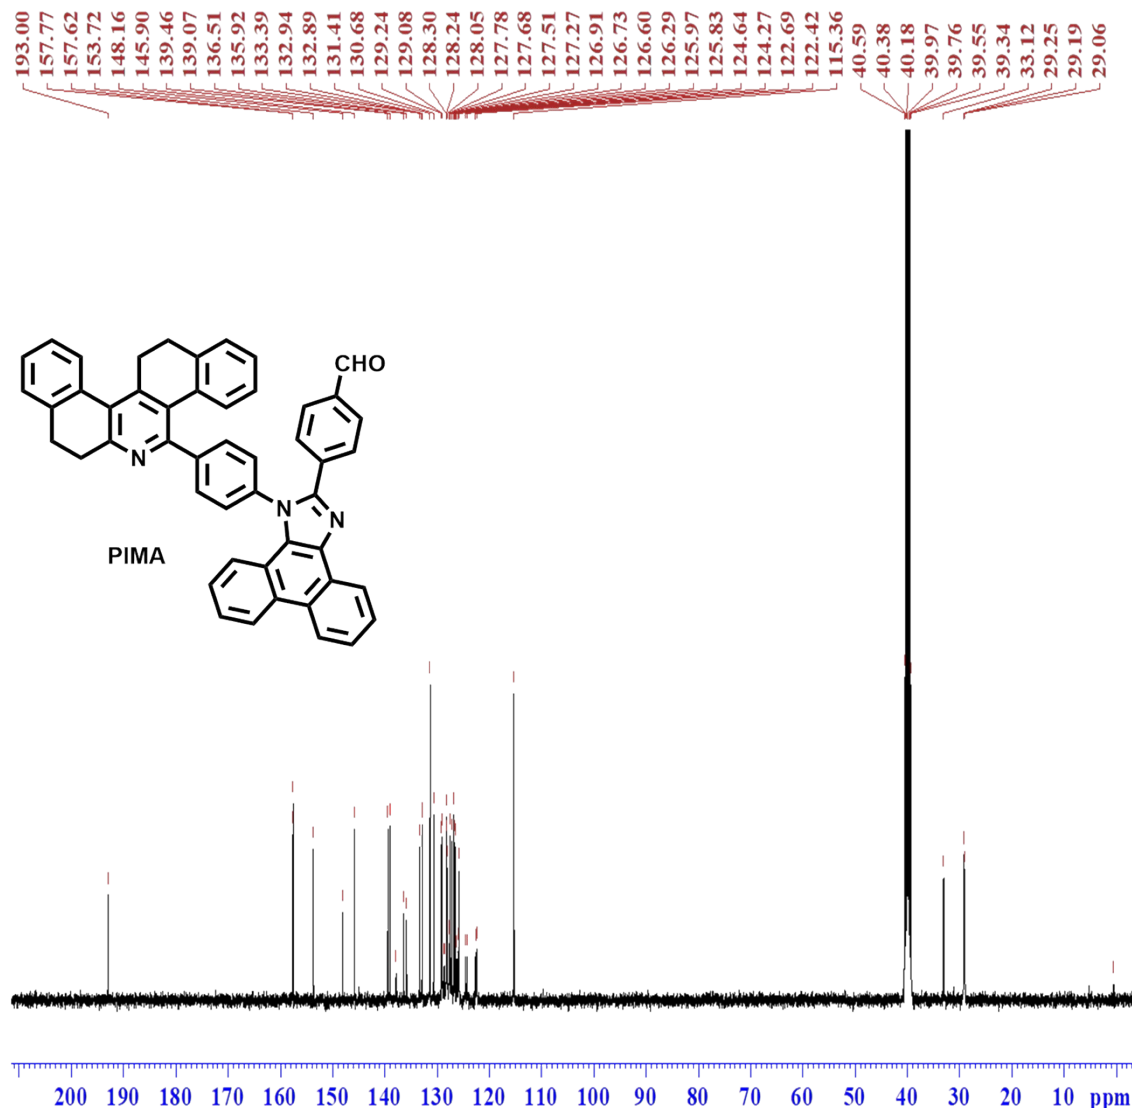

Current Data Parameters  
 NAME Dr.SYN091018  
 EXPNO 26  
 PROCNO 1

F2 - Acquisition Parameters  
 Date\_ 20181006  
 Time 21.20 h  
 INSTRUM spect  
 PROBHD Z108618\_0505 (  
 PULPROG zgpg30  
 TD 65536  
 SOLVENT DMSO  
 NS 512  
 DS 4  
 SWH 24038.461 Hz  
 FIDRES 0.733596 Hz  
 AQ 1.3631488 sec  
 RG 175.97  
 DW 20.800 usec  
 DE 6.50 usec  
 TE 298.7 K  
 D1 2.0000000 sec  
 D11 0.0300000 sec  
 TD0 1  
 SFO1 100.6550186 MHz  
 NUC1 13C  
 P1 9.80 usec  
 PLW1 58.0000000 W  
 SFO2 400.2596010 MHz  
 NUC2 1H  
 CPDPRG[2] waltz16  
 PCPD2 90.00 usec  
 PLW2 15.0000000 W  
 PLW12 0.3770999 W  
 PLW13 0.1896800 W

F2 - Processing parameters  
 SI 32768  
 SF 100.6449542 MHz  
 WDW EM  
 SSB 0  
 LB 1.00 Hz  
 GB 0  
 PC 1.40

Figure-S4. <sup>13</sup>C NMR (100 MHz, DMSO) spectra of compound 7

# PQTA2AP 1H NMR

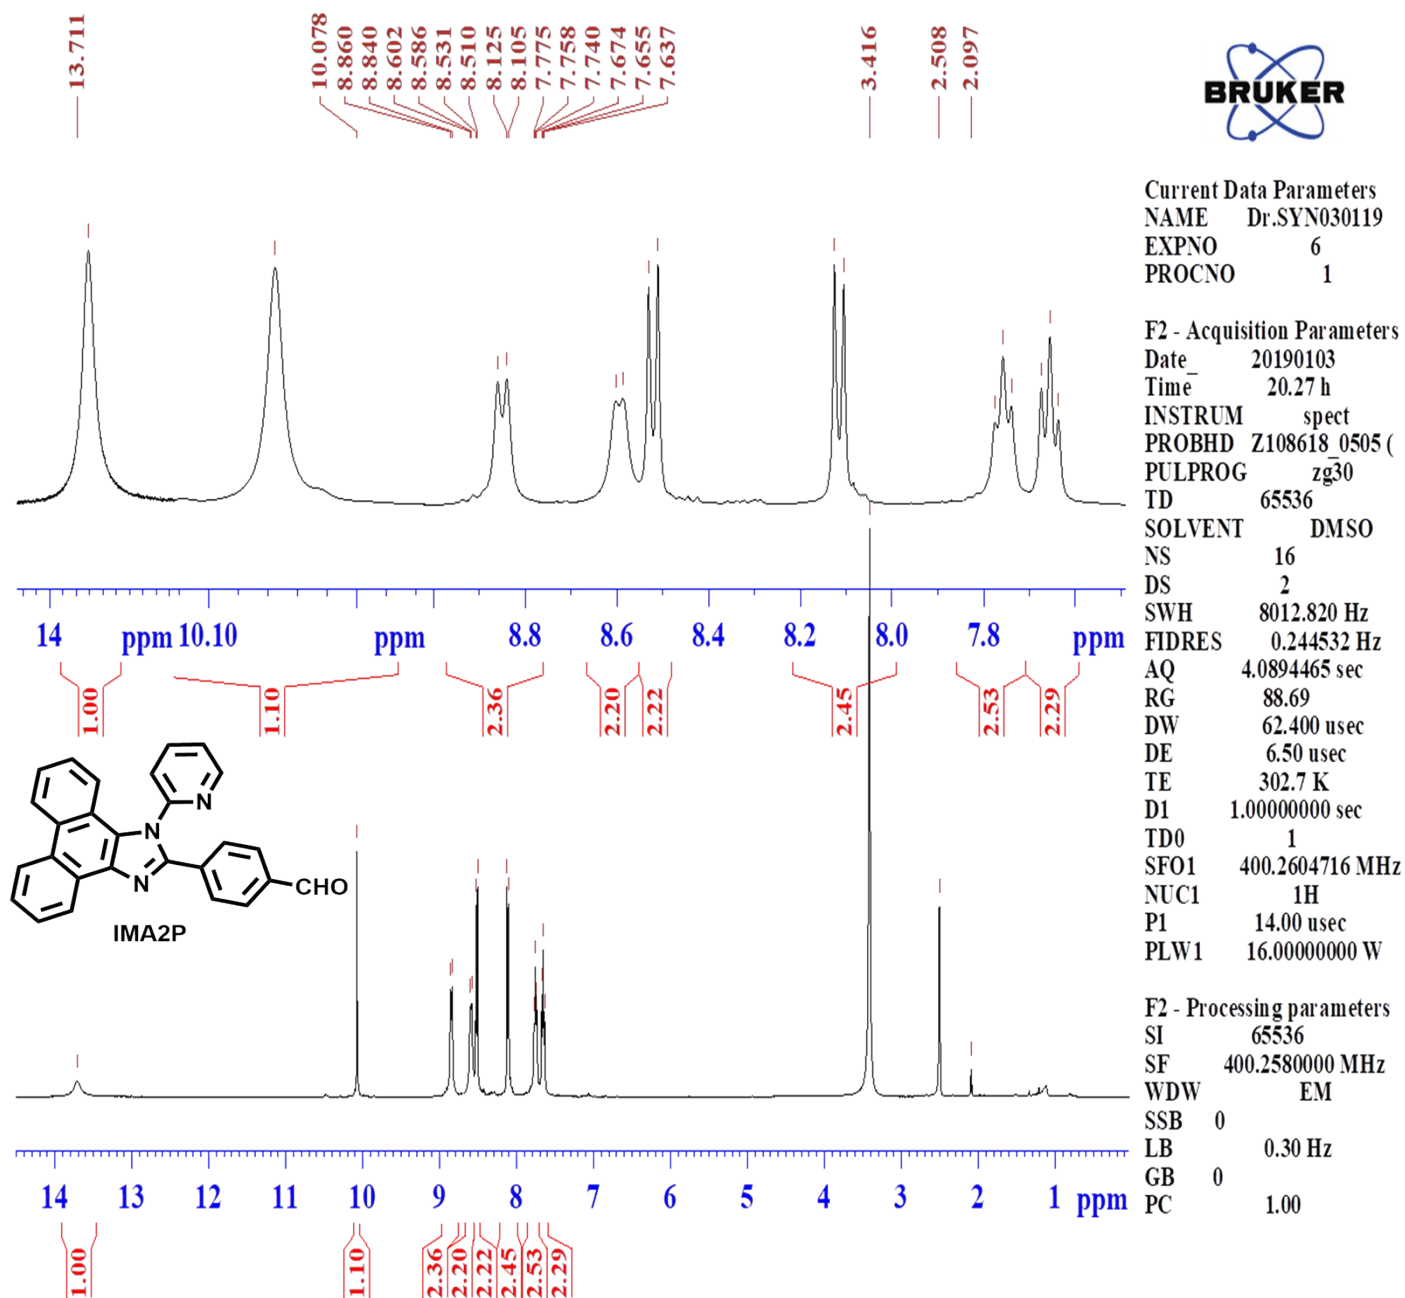

Figure-S5. <sup>1</sup>H NMR (400 MHz, DMSO) spectra of compound 9a

PQTA2AP <sup>13</sup>C NMR

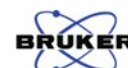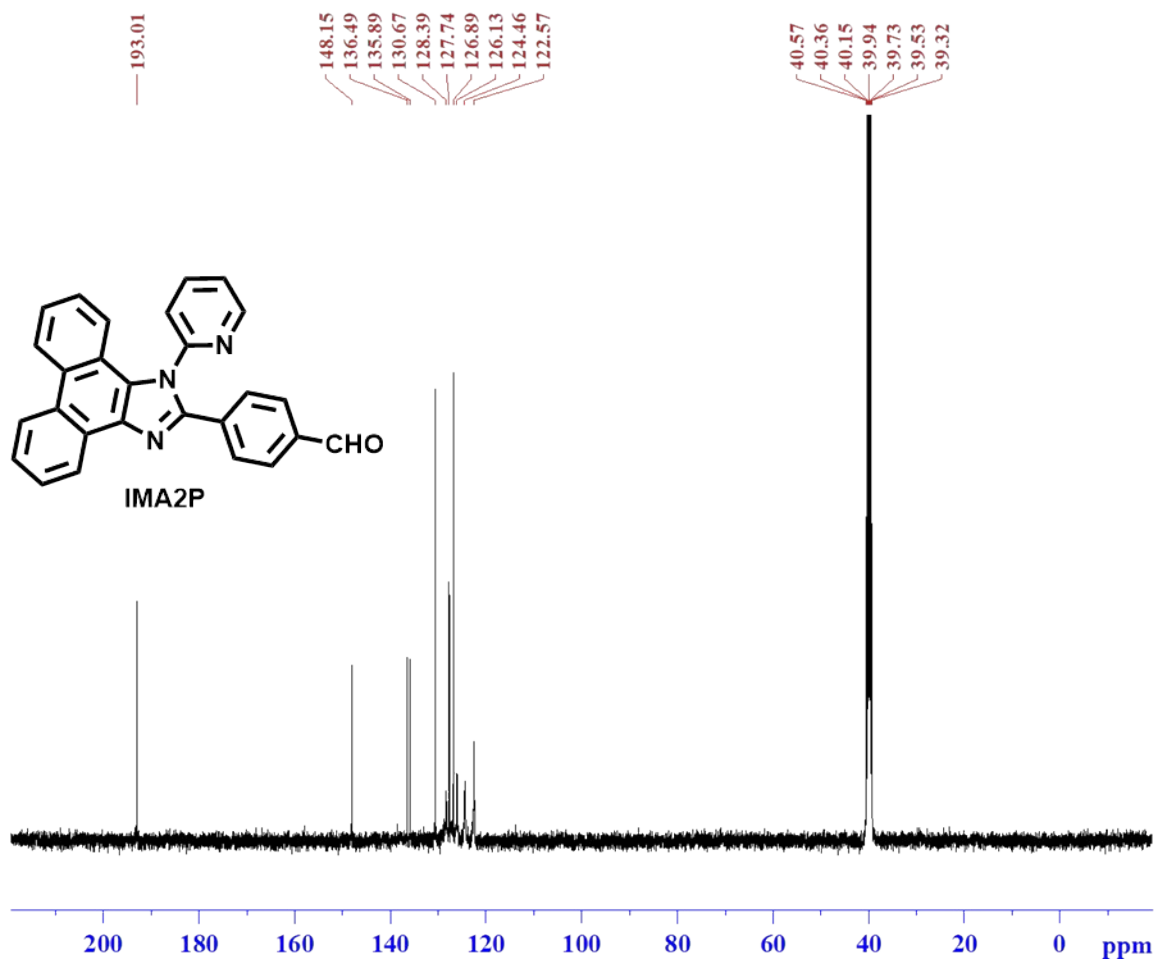

Current Data Parameters  
 NAME Dr.SYN030119  
 EXPNO 7  
 PROCNO 1

F2 - Acquisition Parameters  
 Date\_ 20190103  
 Time 20.57 h  
 INSTRUM spect  
 PROBHD Z108618\_0505 ( )  
 PULPROG zgpg30  
 TD 65536  
 SOLVENT DMSO  
 NS 512  
 DS 4  
 SWH 24038.461 Hz  
 FIDRES 0.733596 Hz  
 AQ 1.3631488 sec  
 RG 156.91  
 DW 20.800 usec  
 DE 6.50 usec  
 TE 303.1 K  
 D1 2.0000000 sec  
 D11 0.03000000 sec  
 TD0 1  
 SFO1 100.6550186 MHz  
 NUC1 <sup>13</sup>C  
 P1 9.80 usec  
 PLW1 58.00000000 W  
 SFO2 400.2596010 MHz  
 NUC2 <sup>1</sup>H  
 CPDPRG[2] waltz16  
 PCPD2 90.00 usec  
 PLW2 16.00000000 W  
 PLW12 0.38716000 W  
 PLW13 0.19474000 W

F2 - Processing parameters  
 SI 32768  
 SF 100.6449542 MHz  
 WDW EM  
 SSB 0  
 LB 1.00 Hz  
 GB 0  
 PC 1.40

Figure-S6. <sup>13</sup>C NMR (100 MHz, DMSO) spectra of compound 9a

PQTA3AP\_1H NMR

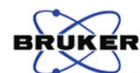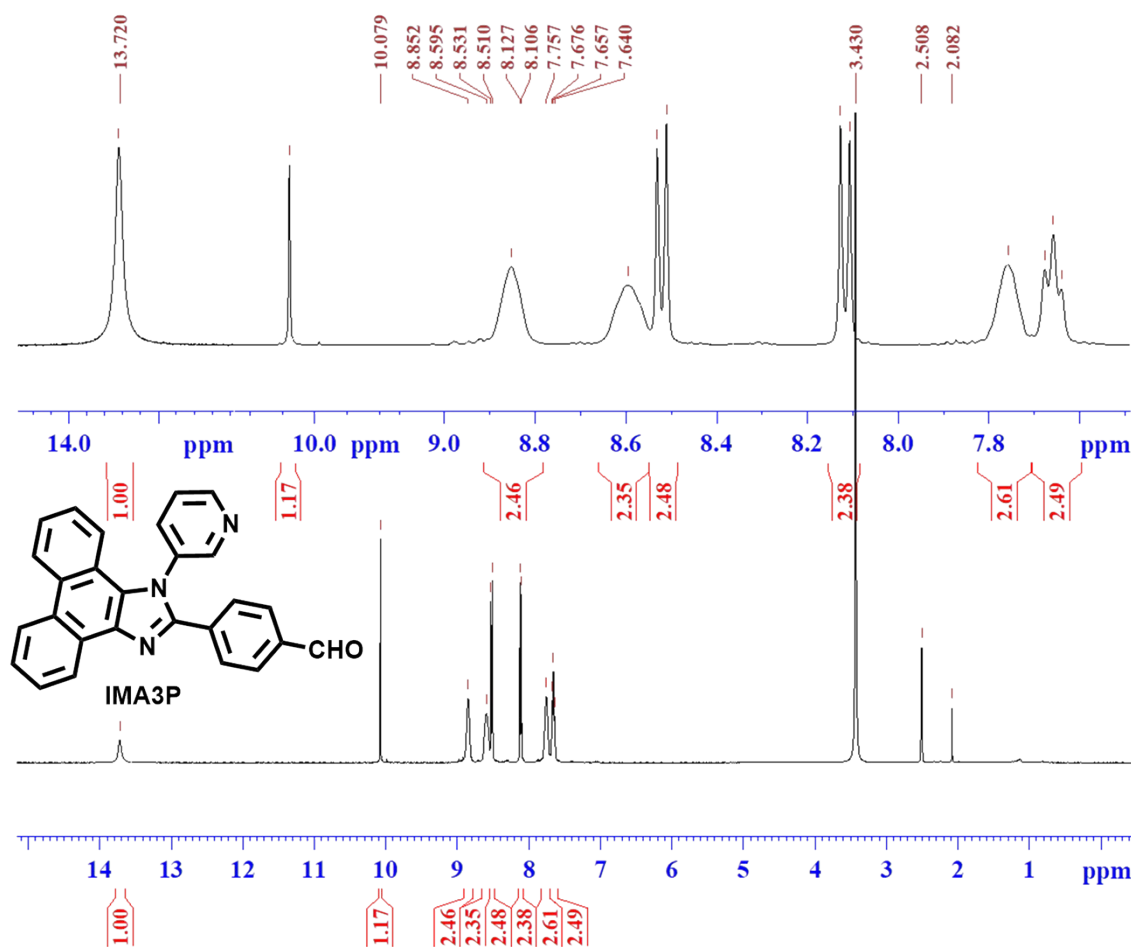

Current Data Parameters  
 NAME Dr.SYN220119  
 EXPNO 41  
 PROCNO 1

F2 - Acquisition Parameters  
 Date\_ 20190123  
 Time 7.26 h  
 INSTRUM spect  
 PROBHD Z108618\_0505 (zg30)  
 PULPROG zg30  
 TD 65536  
 SOLVENT DMSO  
 NS 16  
 DS 2  
 SWH 8012.820 Hz  
 FIDRES 0.244532 Hz  
 AQ 4.0894465 sec  
 RG 77.73  
 DW 62.400 usec  
 DE 6.50 usec  
 TE 310.6 K  
 D1 1.00000000 sec  
 TD0 1  
 SFO1 400.2604716 MHz  
 NUC1 1H  
 P1 14.00 usec  
 PLW1 16.00000000 W

F2 - Processing parameters  
 SI 65536  
 SF 400.2580000 MHz  
 WDW EM  
 SSB 0  
 LB 0.30 Hz  
 GB 0  
 PC 1.00

Figure-S7. <sup>1</sup>H NMR (400 MHz, DMSO) spectra of compound **9b**

PQTA3AP\_13C NMR

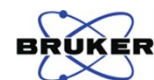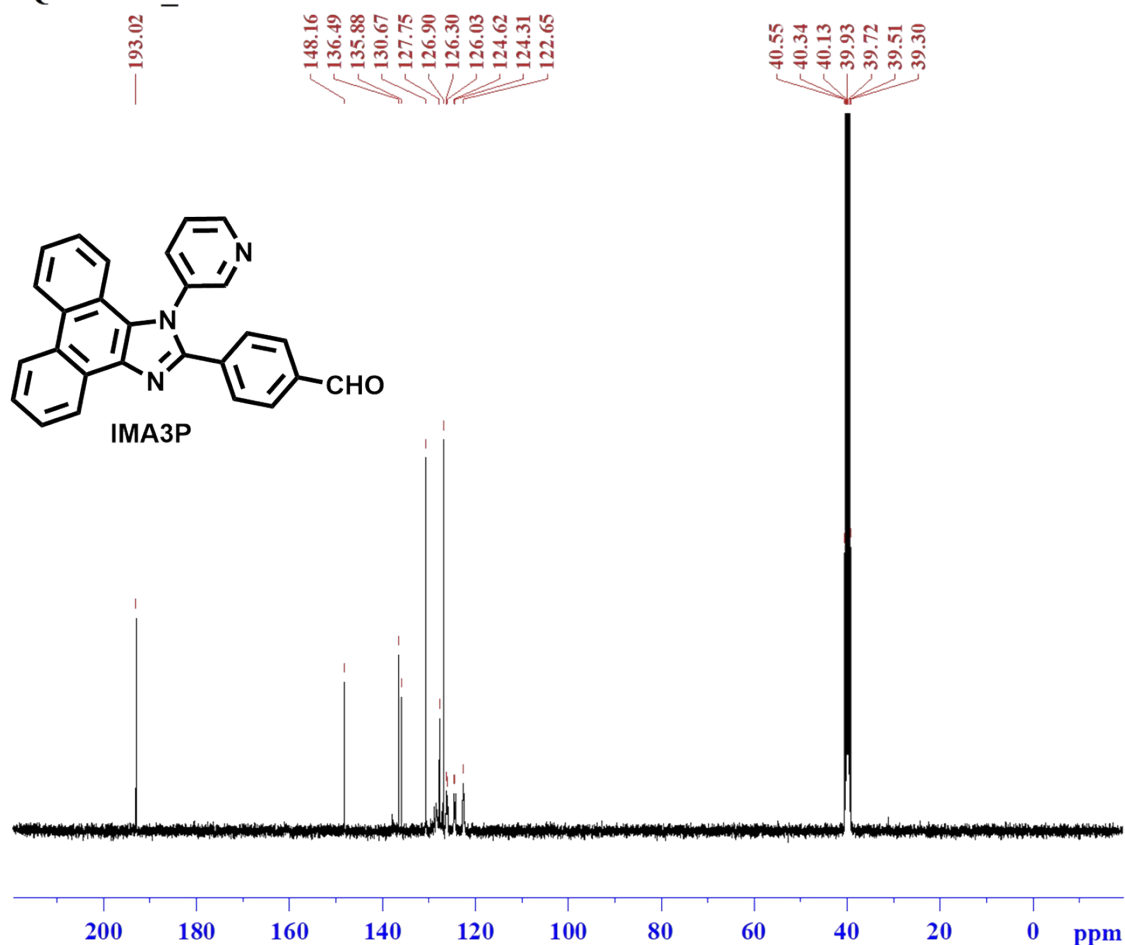

Current Data Parameters  
NAME Dr.SYN220119  
EXPNO 42  
PROCNO 1

F2 - Acquisition Parameters  
Date\_ 20190123  
Time 7.57 h  
INSTRUM spect  
PROBHD Z108618 0505 ( )  
PULPROG zgpg30  
TD 65536  
SOLVENT DMSO  
NS 512  
DS 4  
SWH 24038.461 Hz  
FIDRES 0.733596 Hz  
AQ 1.3631488 sec  
RG 127.79  
DW 20.800 usec  
DE 6.50 usec  
TE 311.4 K  
D1 2.00000000 sec  
D11 0.03000000 sec  
TD0 1  
SFO1 100.6550186 MHz  
NUC1 13C  
P1 9.80 usec  
PLW1 58.00000000 W  
SFO2 400.2596010 MHz  
NUC2 1H  
CPDPRG[2] waltz16  
PCPD2 90.00 usec  
PLW2 16.00000000 W  
PLW12 0.38716000 W  
PLW13 0.19474000 W

F2 - Processing parameters  
SI 32768  
SF 100.6449542 MHz  
WDW EM  
SSB 0  
LB 1.00 Hz  
GB 0  
PC 1.40

Figure-S8. <sup>13</sup>C NMR (100 MHz, DMSO) spectra of compound 9b

PQTA4AP 1H NMR

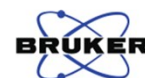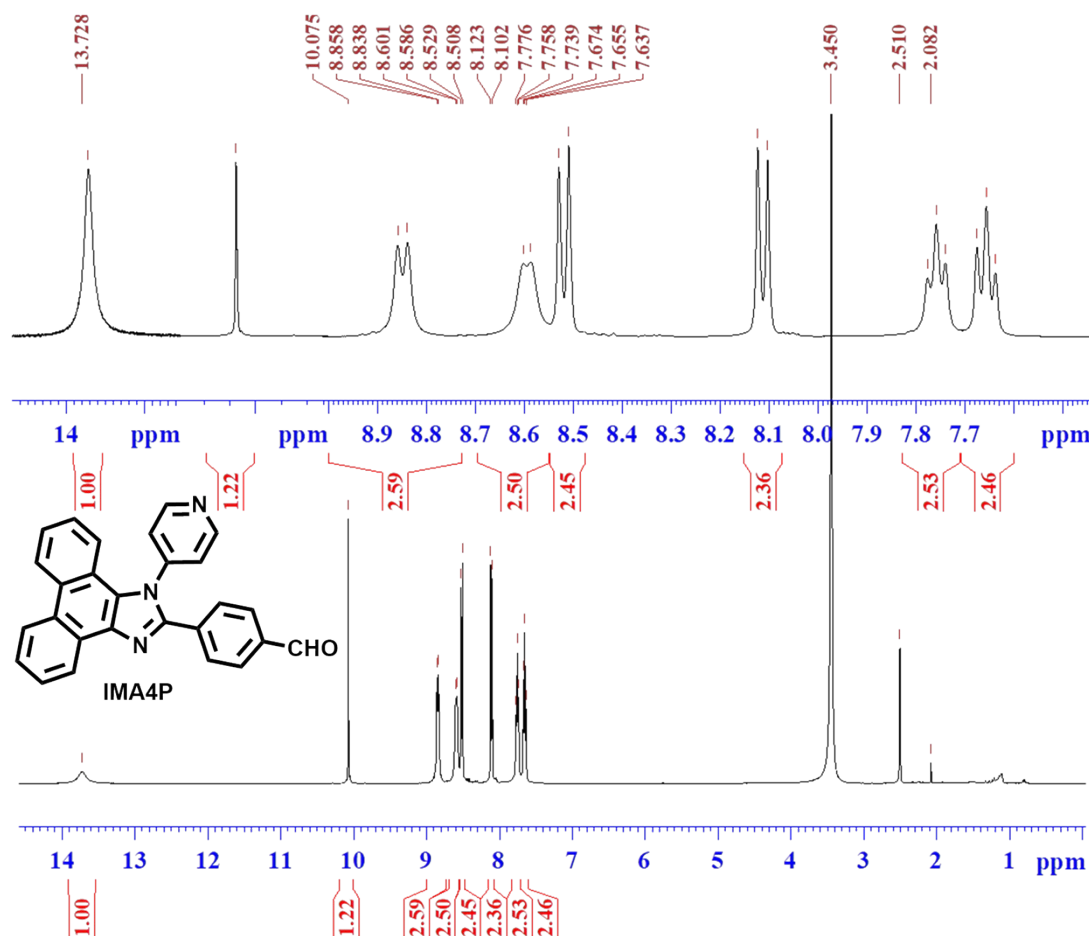

Current Data Parameters  
 NAME Dr.SYN220119  
 EXPNO 39  
 PROCNO 1

F2 - Acquisition Parameters  
 Date\_ 20190123  
 Time 5.48 h  
 INSTRUM spect  
 PROBHD Z108618 0505 (ZG30)  
 PULPROG zg30  
 TD 65536  
 SOLVENT DMSO  
 NS 16  
 DS 2  
 SWH 8012.820 Hz  
 FIDRES 0.244532 Hz  
 AQ 4.0894465 sec  
 RG 71.13  
 DW 62.400 usec  
 DE 6.50 usec  
 TE 310.6 K  
 D1 1.00000000 sec  
 TD0 1  
 SFO1 400.2604716 MHz  
 NUC1 1H  
 P1 14.00 usec  
 PLW1 16.00000000 W

F2 - Processing parameters  
 SI 65536  
 SF 400.2580000 MHz  
 WDW EM  
 SSB 0  
 LB 0.30 Hz  
 GB 0  
 PC 1.00

Figure-S9. <sup>1</sup>H NMR (400 MHz, DMSO) spectra of compound 9c



PQTA4AP\_13C NMR

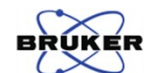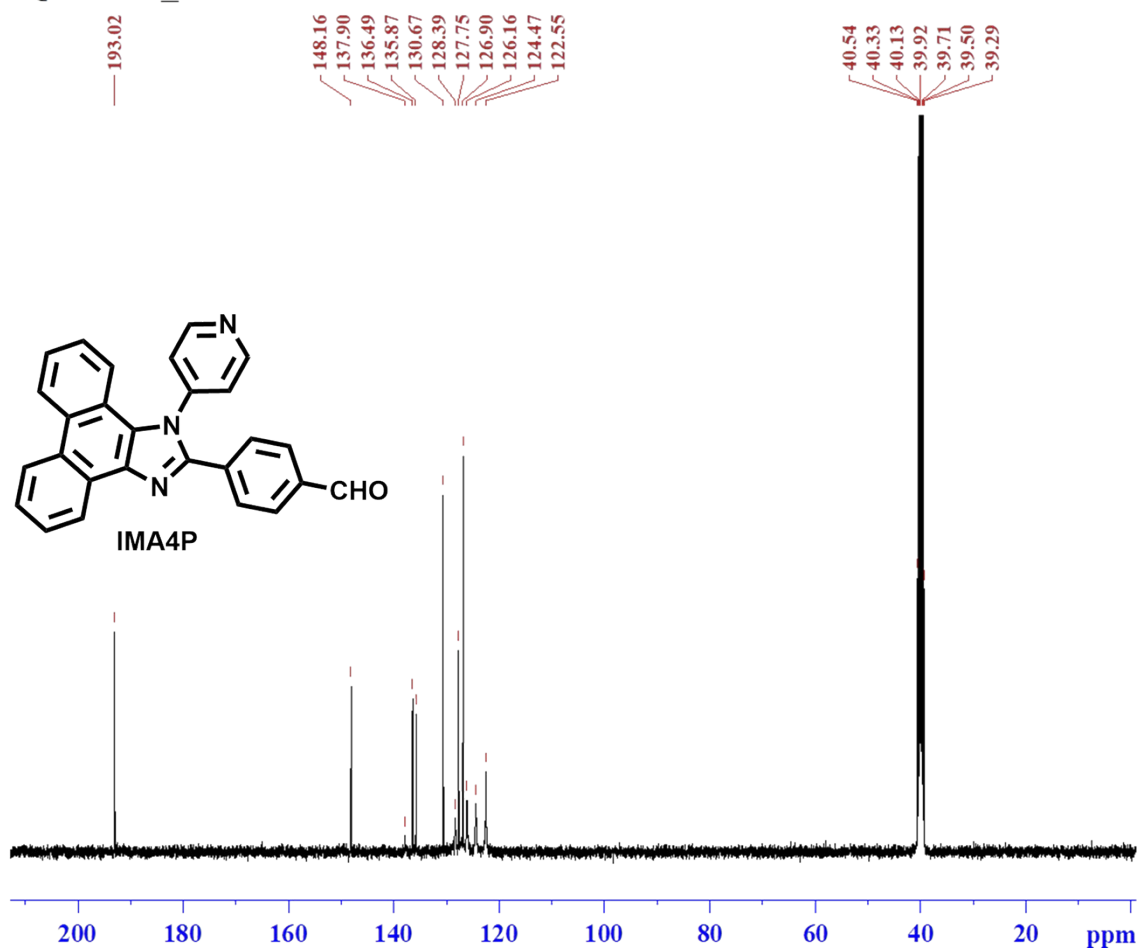

Current Data Parameters  
 NAME Dr.SYN220119  
 EXPNO 40  
 PROCNO 1

F2 - Acquisition Parameters  
 Date\_ 20190123  
 Time 6.20 h  
 INSTRUM spect  
 PROBHD Z108618\_0505 (  
 PULPROG zgpg30  
 TD 65536  
 SOLVENT DMSO  
 NS 512  
 DS 4  
 SWH 24038.461 Hz  
 FIDRES 0.733596 Hz  
 AQ 1.3631488 sec  
 RG 77.73  
 DW 20.800 usec  
 DE 6.50 usec  
 TE 311.4 K  
 D1 2.00000000 sec  
 D11 0.03000000 sec  
 TD0 1  
 SFO1 100.6550186 MHz  
 NUC1 13C  
 P1 9.80 usec  
 PLW1 58.00000000 W  
 SFO2 400.2596010 MHz  
 NUC2 1H  
 CPDPRG[2] waltz16  
 PCPD2 90.00 usec  
 PLW2 16.00000000 W  
 PLW12 0.38716000 W  
 PLW13 0.19474000 W

F2 - Processing parameters  
 SI 32768  
 SF 100.6449542 MHz  
 WDW EM  
 SSB 0  
 LB 1.00 Hz  
 GB 0  
 PC 1.40

Figure-S10. <sup>13</sup>C NMR (100 MHz, DMSO) spectra of compound 9c

# Spectrum Plot Report

Name: 230719-21-MDM-P4APT Rack Pos. Instrument: Instrument 1 Operator:   
Inj. Vol. (ul): 5 Plate Pos. Instrument 1 Success   
Data File: P4APT.d Method (Acq): Direct Infusion HPLC.m Comment: Acq. Time (Local): 24-07-2019 10:54:15 (UTC+05:30)

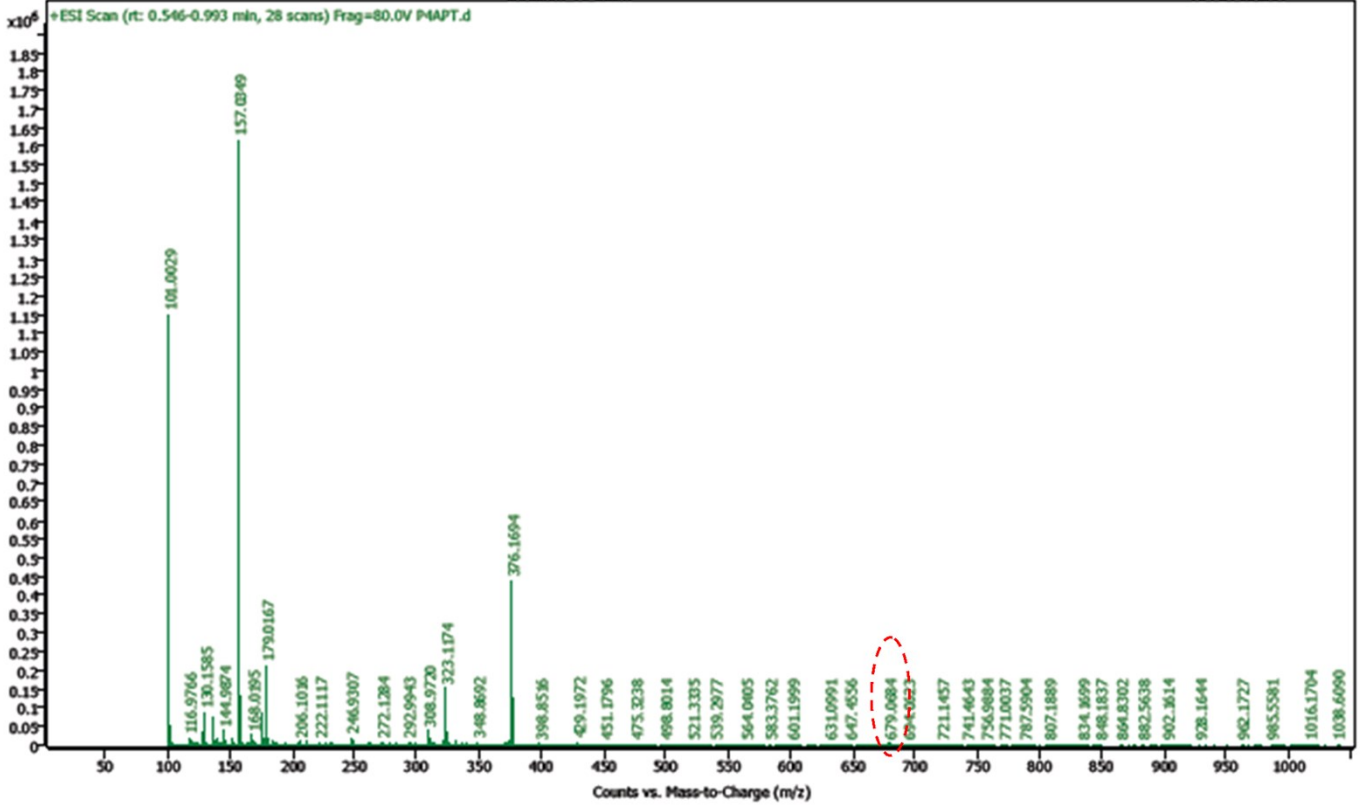

Figure-S11. ESI-MS spectra of compound of 7

## ESI Mass Report

|                       |                       |                           |                                                     |
|-----------------------|-----------------------|---------------------------|-----------------------------------------------------|
| <b>Name</b>           | 230719-22-MJM-Pq2APTA | <b>Data File Path</b>     | D:\MassHunter\Data\2019\JULY-2019\MJM\Pq2APTA.d     |
| <b>Sample ID</b>      |                       | <b>Acq. Time (Local)</b>  | 24-07-2019 10:57:26 (UTC+05:30)                     |
| <b>Instrument</b>     | Instrument 1          | <b>Method Path (Acq)</b>  | D:\MassHunter\Methods\Direct Infusion_HPLC.m        |
| <b>MS Type</b>        | QTOF                  | <b>Version (Acq SW)</b>   | 6200 series TOF/6500 series Q-TOF B.08.00 (B8058.0) |
| <b>Inj. Vol. (ul)</b> | 5                     | <b>IRM Status</b>         | Success                                             |
| <b>Position</b>       | P2-E11                | <b>Method Path (DA)</b>   | D:\MassHunter\Methods\10.0\IIT-Target Screening_1.m |
| <b>Plate Pos.</b>     |                       | <b>Target Source Path</b> |                                                     |
| <b>Operator</b>       |                       | <b>Result Summary</b>     | 1 qualified (1 targets)                             |

## Compound Details

Cpd. 1: C<sub>27</sub>H<sub>17</sub>N<sub>3</sub>O

Compound Spectra (overlaid)

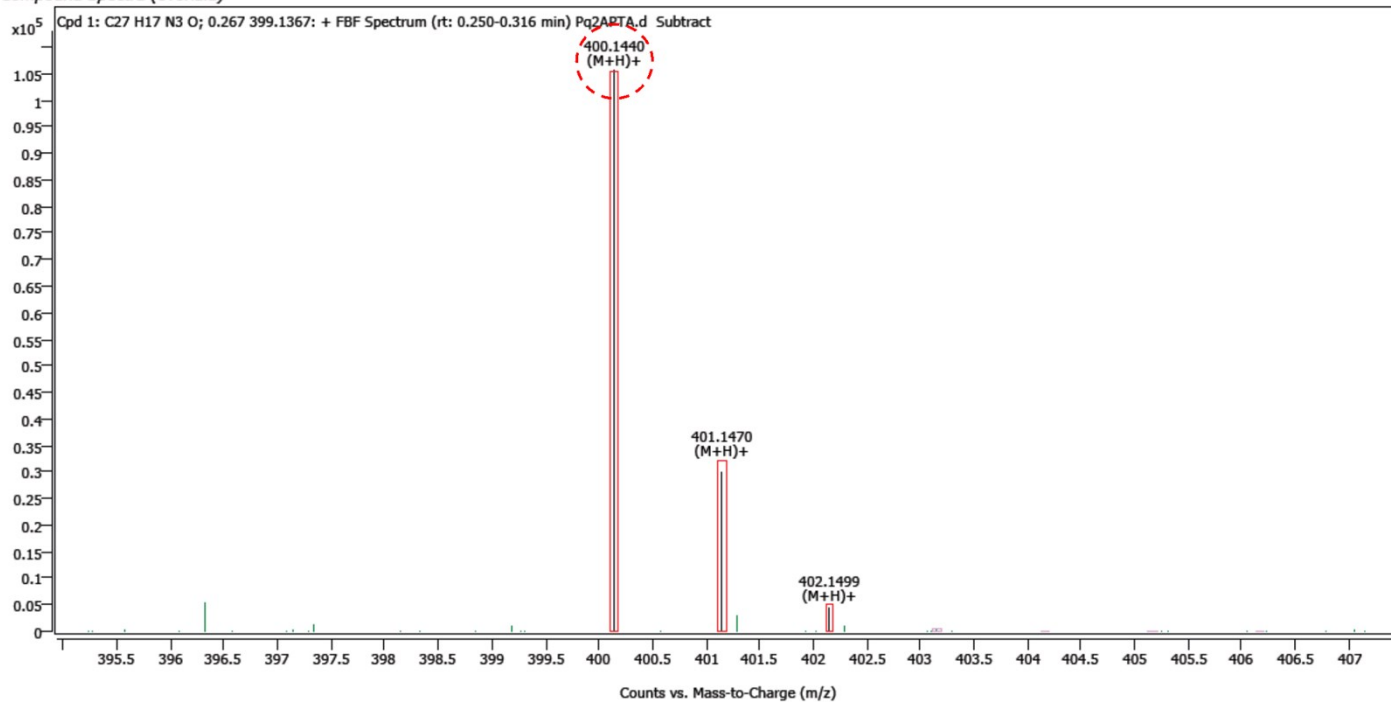

Compound ID Table

| Cpd | Formula                                          | Mass (Tgt) | Calc. Mass | Mass     | Species            | Diff(Tgt.ppm) | mDa   |
|-----|--------------------------------------------------|------------|------------|----------|--------------------|---------------|-------|
| 1   | C <sub>27</sub> H <sub>17</sub> N <sub>3</sub> O | 399.1372   | 399.1367   | 400.1440 | (M+H) <sup>+</sup> | -1.28         | -0.51 |

Figure-S12. ESI-MS spectra of compound of 9a

## ESI Mass Report

|                       |                      |                           |                                                     |
|-----------------------|----------------------|---------------------------|-----------------------------------------------------|
| <b>Name</b>           | 230719-23-MJM-Pq3APA | <b>Data File Path</b>     | D:\MassHunter\Data\2019\JULY-2019\MJM\Pq3APA.d      |
| <b>Sample ID</b>      |                      | <b>Acq. Time (Local)</b>  | 24-07-2019 11:00:37 (UTC+05:30)                     |
| <b>Instrument</b>     | Instrument 1         | <b>Method Path (Acq)</b>  | D:\MassHunter\Methods\Direct Infusion_HPLC.m        |
| <b>MS Type</b>        | QTOF                 | <b>Version (Acq SW)</b>   | 6200 series TOF/6500 series Q-TOF B.08.00 (B8058.0) |
| <b>Inj. Vol. (ul)</b> | 5                    | <b>IRM Status</b>         | Success                                             |
| <b>Position</b>       | P2-F1                | <b>Method Path (DA)</b>   | D:\MassHunter\Methods\10.0\IIT-Target Screening_1.m |
| <b>Plate Pos.</b>     |                      | <b>Target Source Path</b> |                                                     |
| <b>Operator</b>       |                      | <b>Result Summary</b>     | 1 qualified (1 targets)                             |

## Compound Details

Cpd. 1: C<sub>27</sub> H<sub>17</sub> N<sub>3</sub> O

Compound Spectra (overlaid)

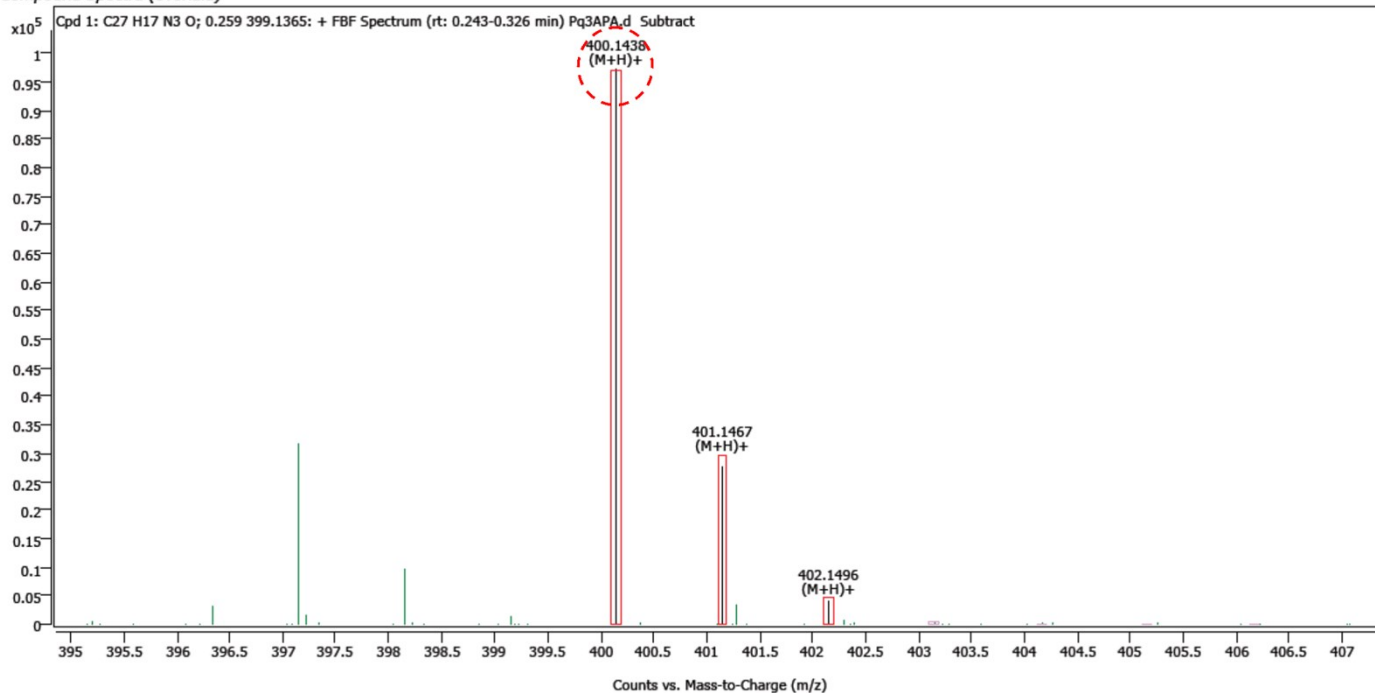

Compound ID Table

| Cpd | Formula                                          | Mass (Tgt) | Calc. Mass | Mass     | Species | Diff(Tgt.ppm) | mDa   |
|-----|--------------------------------------------------|------------|------------|----------|---------|---------------|-------|
| 1   | C <sub>27</sub> H <sub>17</sub> N <sub>3</sub> O | 399.1372   | 399.1365   | 400.1438 | (M+H)+  | -1.71         | -0.68 |

Figure-S13. ESI-MS spectra of compound of **9b**

## ESI Mass Report

|                       |                       |                           |                                                     |
|-----------------------|-----------------------|---------------------------|-----------------------------------------------------|
| <b>Name</b>           | 230719-24-MJM-Pq4APTA | <b>Data File Path</b>     | D:\MassHunter\Data\2019\JULY-2019\MJM\Pq4APTA.d     |
| <b>Sample ID</b>      |                       | <b>Acq. Time (Local)</b>  | 24-07-2019 11:03:47 (UTC+05:30)                     |
| <b>Instrument</b>     | Instrument 1          | <b>Method Path (Acq)</b>  | D:\MassHunter\Methods\Direct Infusion_HPLC.m        |
| <b>MS Type</b>        | QTOF                  | <b>Version (Acq SW)</b>   | 6200 series TOF/6500 series Q-TOF B.08.00 (B8058.0) |
| <b>Inj. Vol. (ul)</b> | 5                     | <b>IRM Status</b>         | Success                                             |
| <b>Position</b>       | P2-F2                 | <b>Method Path (DA)</b>   | D:\MassHunter\Methods\10.0\IIT-Target Screening_1.m |
| <b>Plate Pos.</b>     |                       | <b>Target Source Path</b> |                                                     |
| <b>Operator</b>       |                       | <b>Result Summary</b>     | 1 qualified (1 targets)                             |

## Compound Details

Cpd. 1: C27 H17 N3 O

Compound Spectra (overlaid)

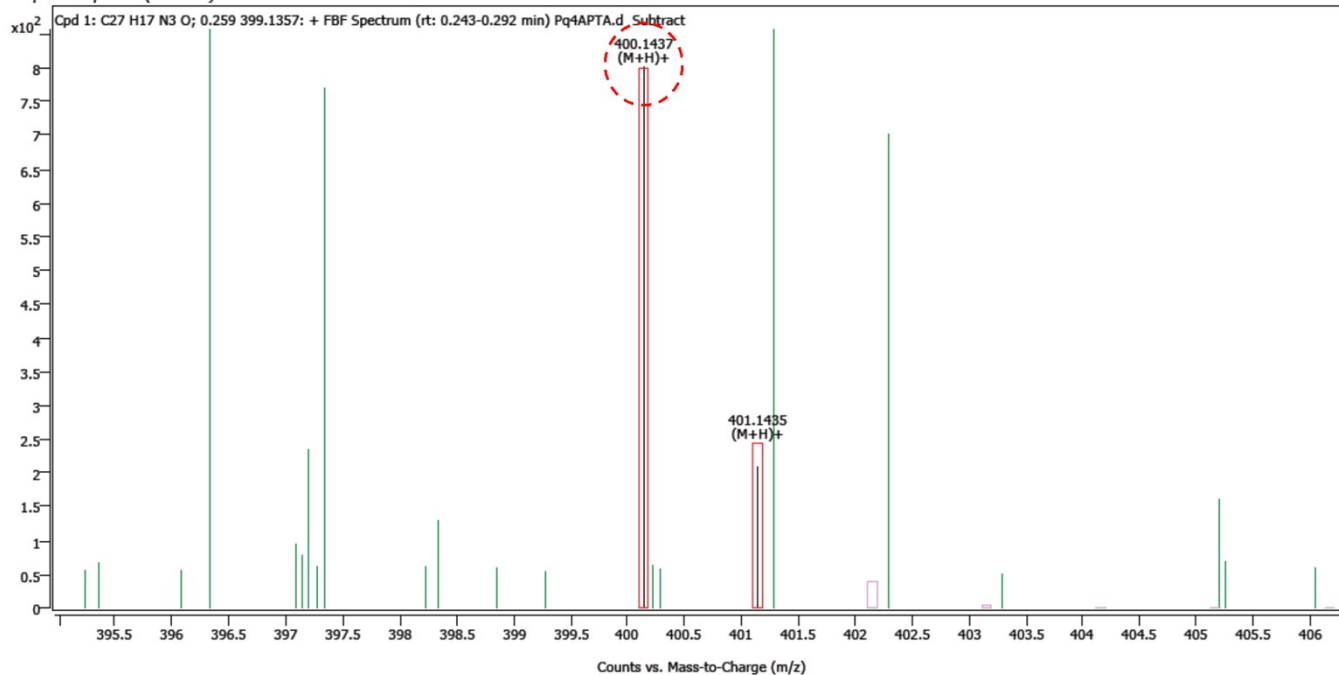

Compound ID Table

| Cpd | Formula      | Mass (Tgt) | Calc. Mass | Mass     | Species | Diff(Tgt.ppm) | mDa   |
|-----|--------------|------------|------------|----------|---------|---------------|-------|
| 1   | C27 H17 N3 O | 399.1372   | 399.1357   | 400.1437 | (M+H)+  | -3.63         | -1.45 |

Figure-S14. ESI-MS spectra of compound of 9c

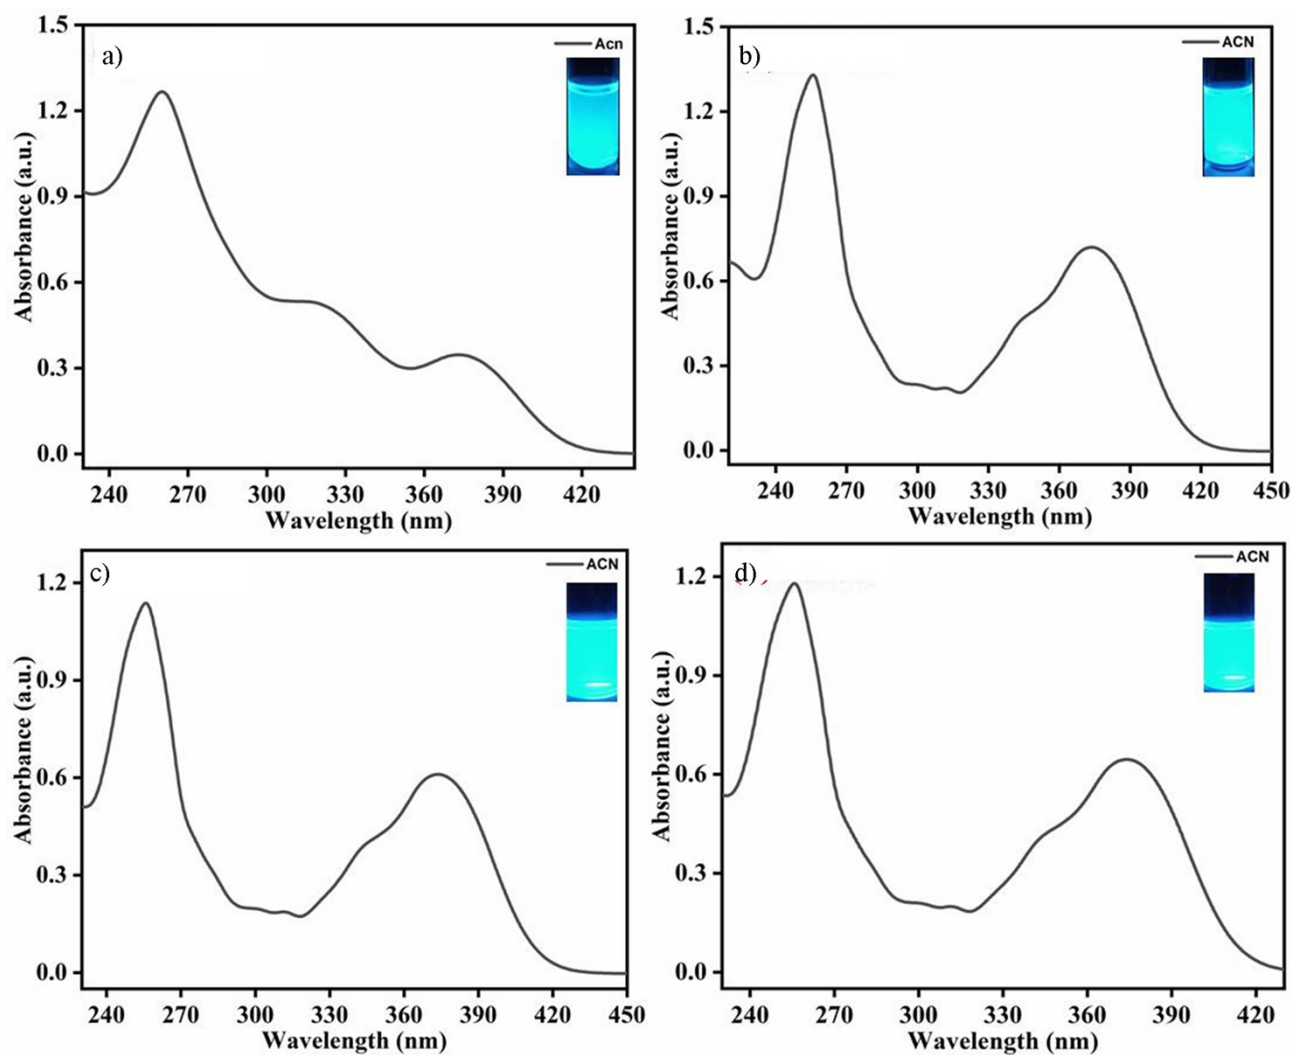

**Figure-S15.** UV spectra of compound of **7** (a), **9a** (b), **9b** (c), and **9c** (d) ( $2 \times 10^{-5}$ ) in Acetonitrile. Inset: compound of probs viewed under UV irradiation.

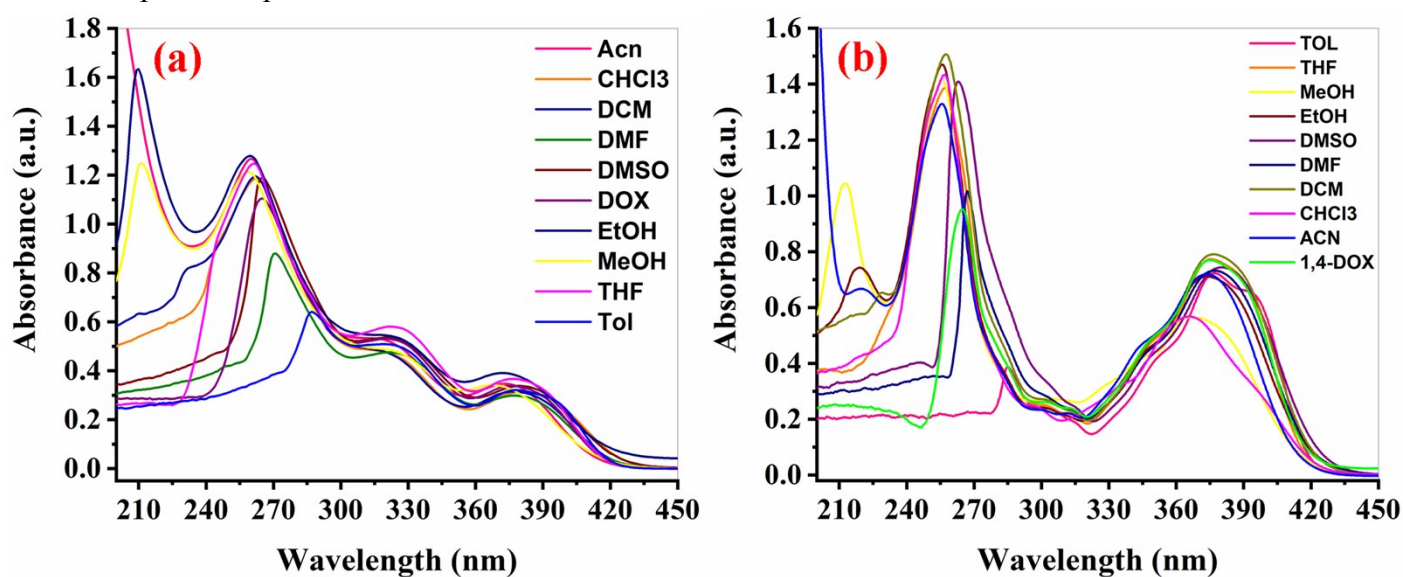

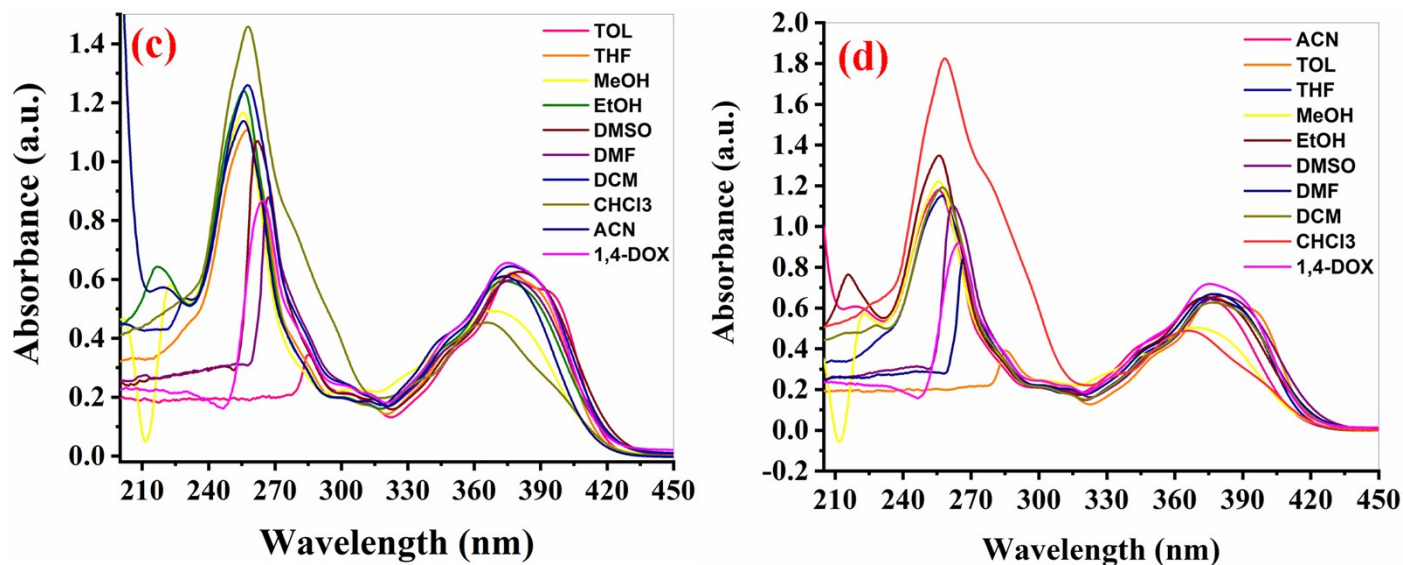

**Figure-S16** Absorbance spectra of compound 7 (a), 9a (b), 9b (c), and 9c (d) ( $2 \times 10^{-5}$ ) measured in different solvents

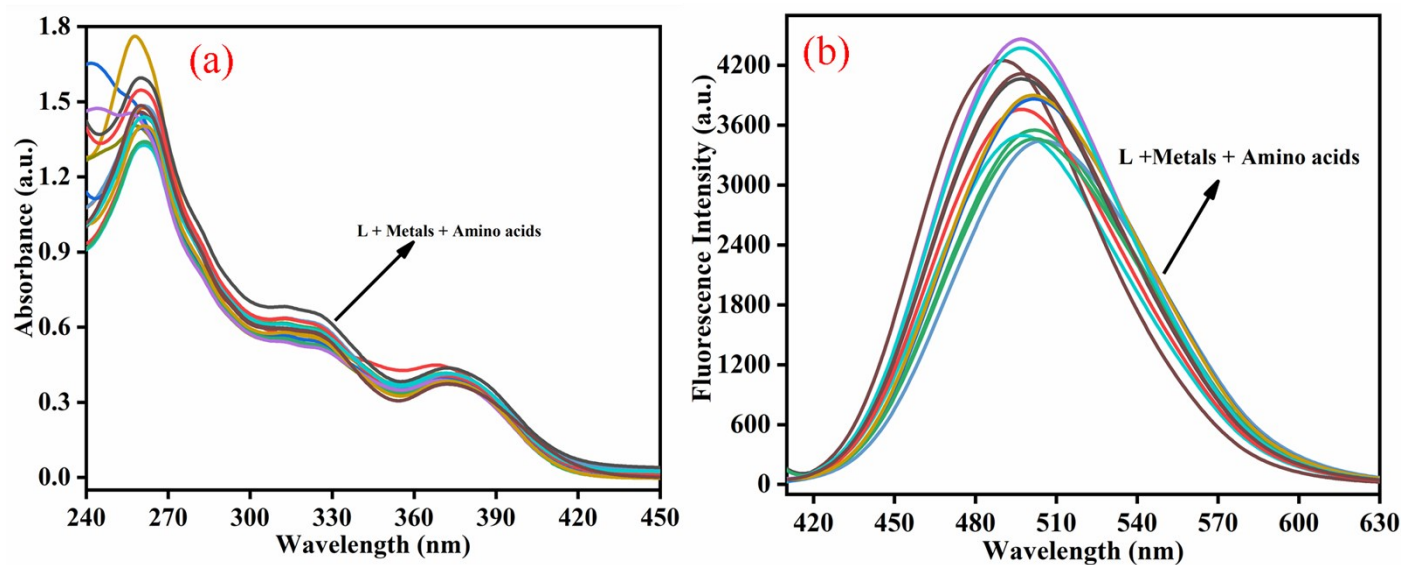

**Figure-S17.** Absorption spectra (a) and emission spectra (b) of compound 7 ( $2 \times 10^{-5}$ ) in the presence of various metal ions and amino acids ( $2 \times 10^{-5}$ ). Similar to (9a , 9b, and 9c) following compounds



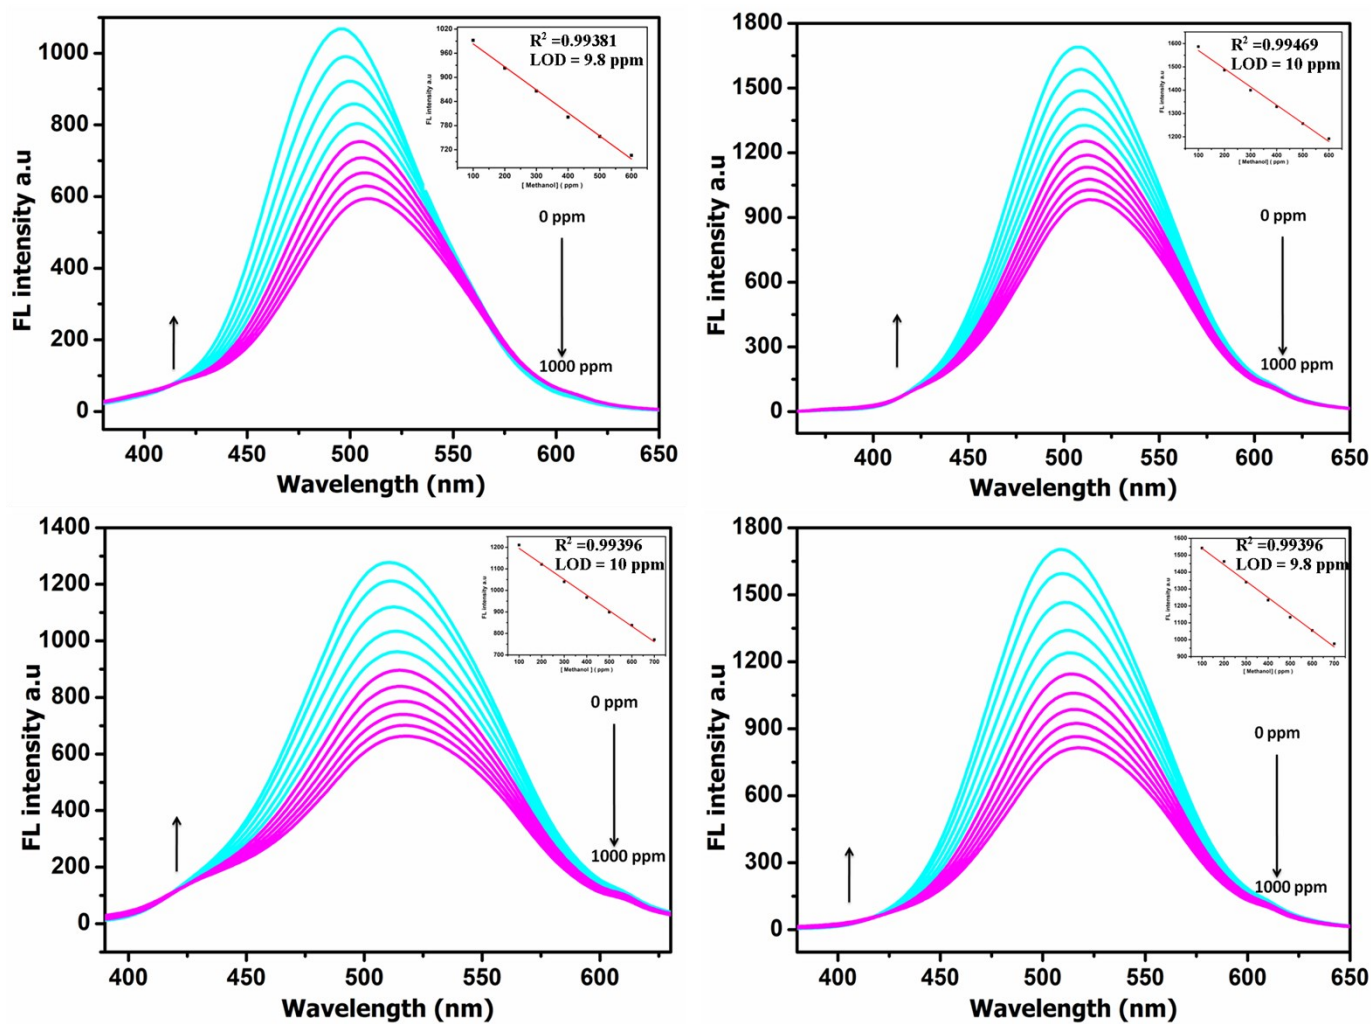

**Figure-S18.** Emission spectra of compound 7, 9a, 9b, and 9c ( $2 \times 10^{-5}$ ) in the presence of methanol (0 to 1000ppm). Inset: linear relation between ligand ( $2 \times 10^{-5}$ ) and methanol concentration (0 to 1000ppm)



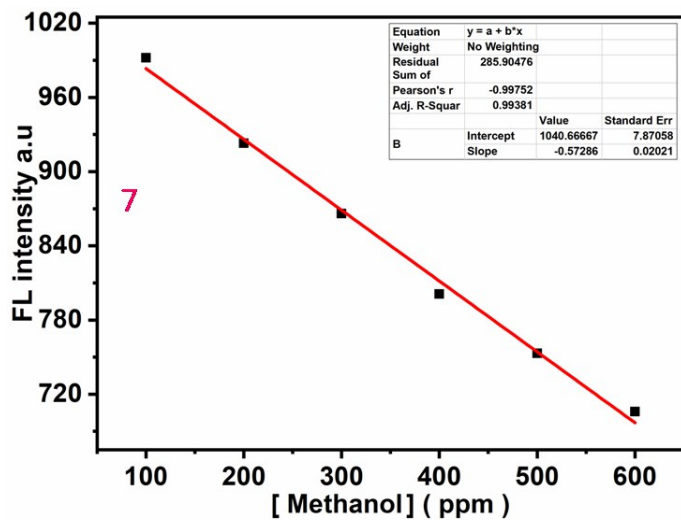

**LOD = 3σ/K**

σ = 1.87  
 K = 0.5720 x10<sup>-6</sup>

LOD = 3 x 1.87 / 0.5720 x10<sup>-6</sup>

**LOD = 9.8 ppm**

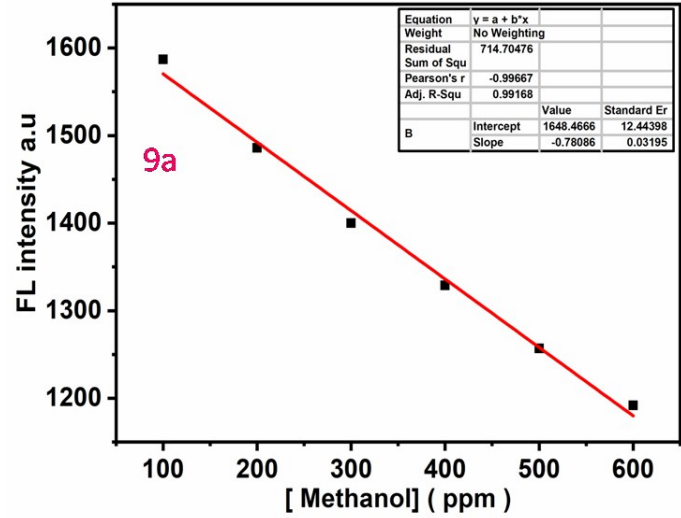

**LOD = 3σ/K**

σ = 2.70  
 K = 0.78086 x10<sup>-6</sup>

LOD = 3 x 2.70 / 0.78086 x10<sup>-6</sup>

**LOD = 10 ppm**

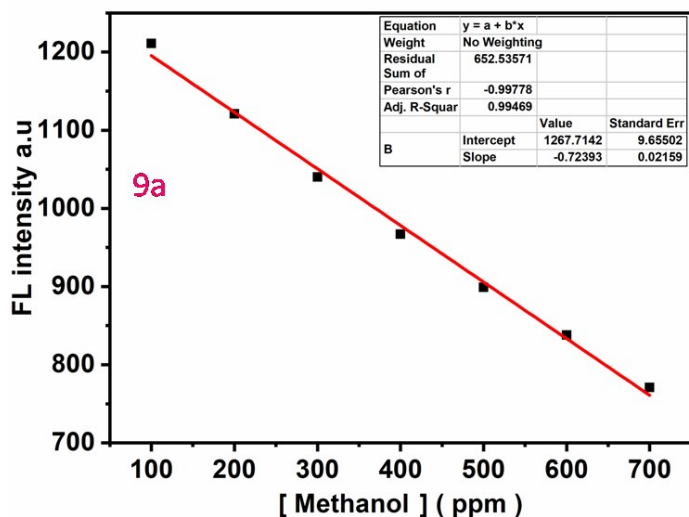

$$\text{LOD} = 3\sigma/K$$

$\sigma = 2.61$   
 $K = 0.72393 \times 10^{-6}$   
 $\text{LOD} = 3 \times 1.87 / 0.5720 \times 10^{-6}$   
**LOD = 10 ppm**

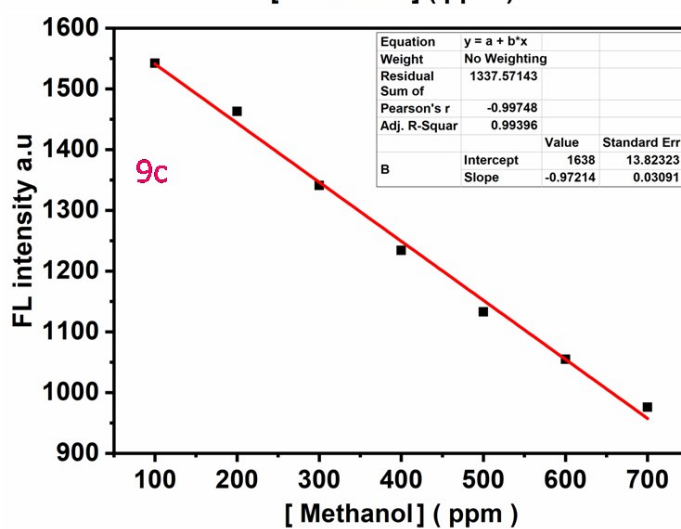

$$\text{LOD} = 3\sigma/K$$

$\sigma = 3.19$   
 $K = 0.97214 \times 10^{-6}$   
 $\text{LOD} = 3 \times 3.19 / 0.97214 \times 10^{-6}$   
**LOD = 10 ppm**

**Figure-S19** Plot of fluorescence intensity compounds of 7, 9a, 9b, 9c (at 438 nm) and the concentration of MeOH and the calculation of LOD

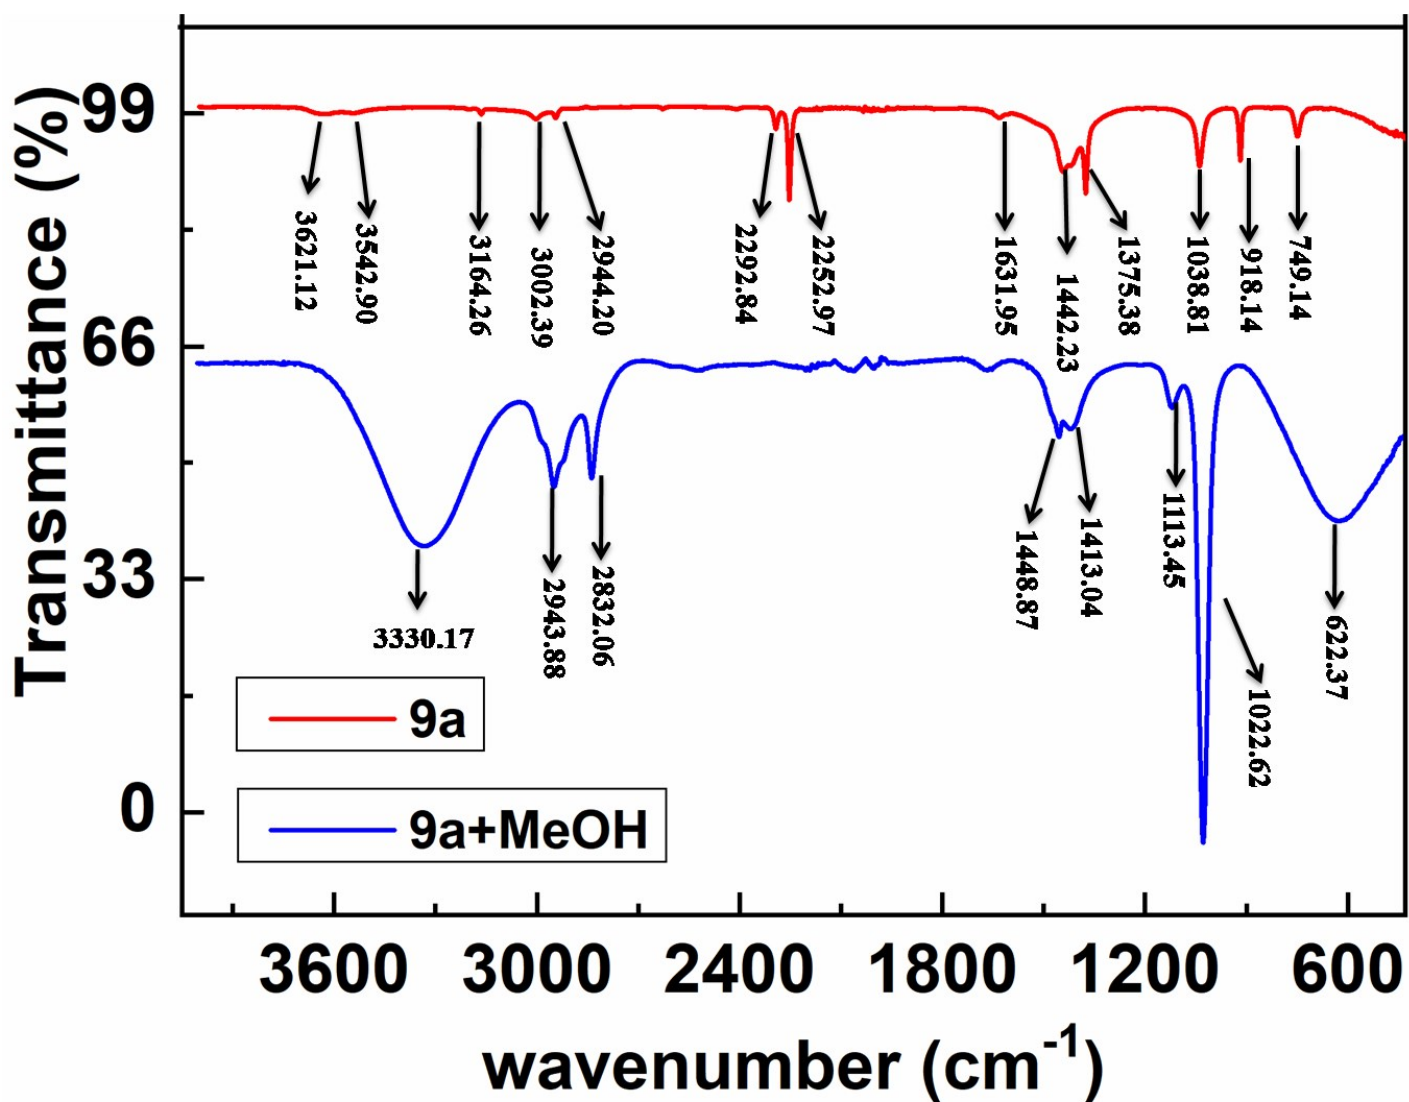

Figure-S20 FTIR spectra of probe 9a and 9a+MeOH

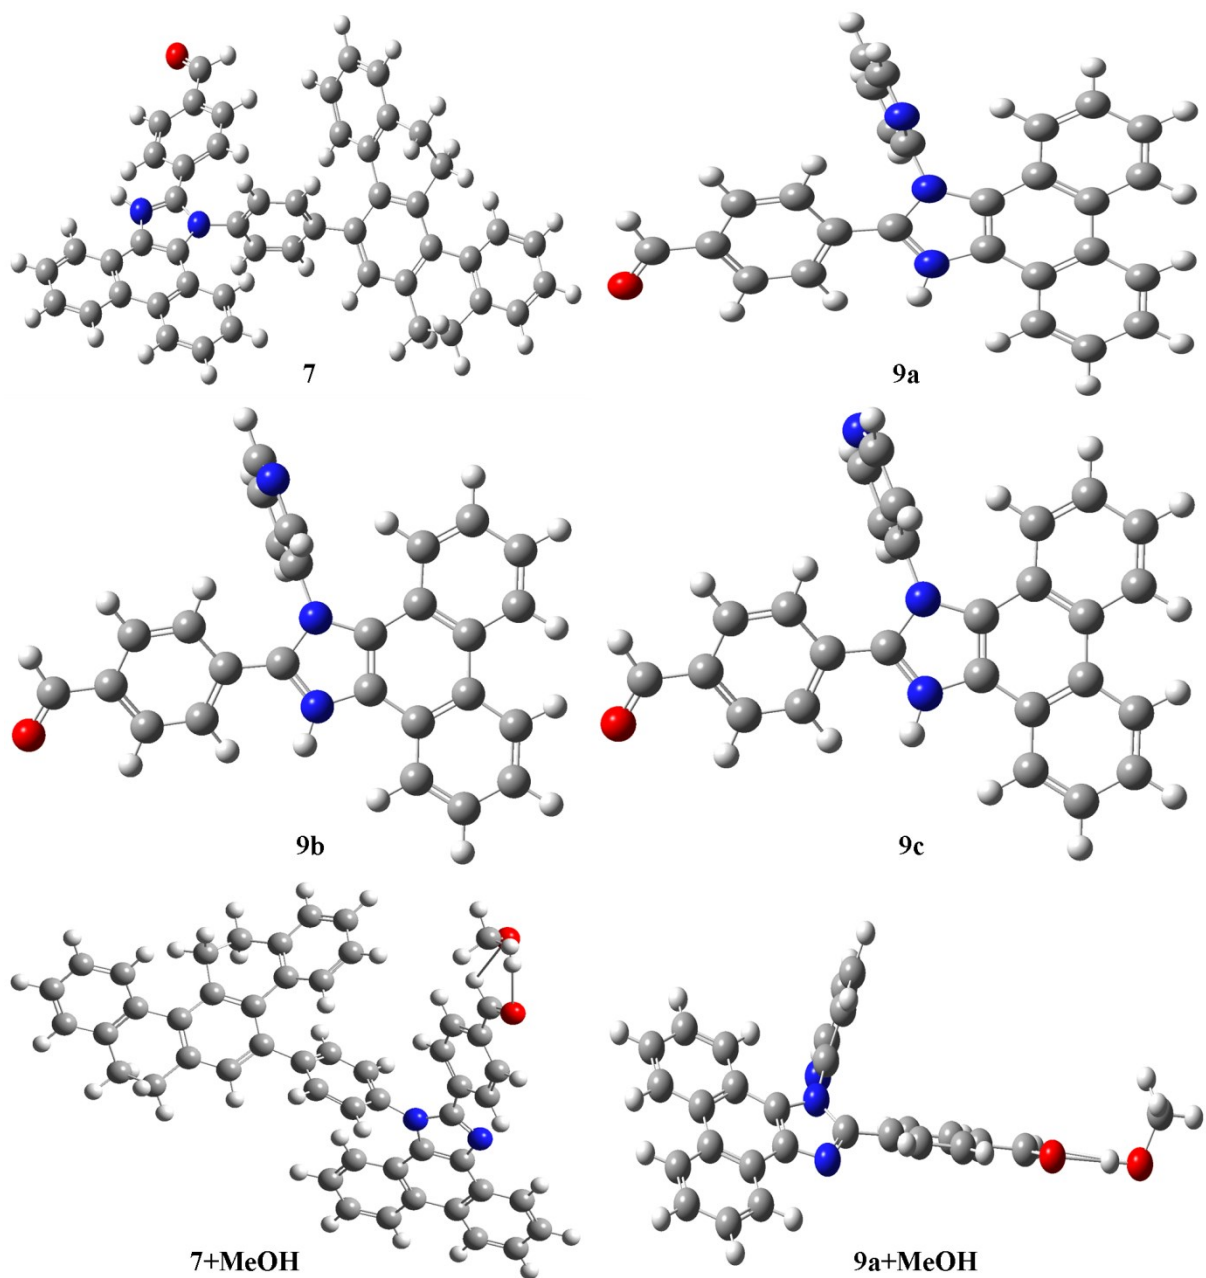

**Figure-S21** Optimized structure of 7, 9a-c, 7+MeOH and 9a+ MeOH

| Entry   | $\lambda$<br>(nm)                             | Oscillator<br>Strength, $f$                                        | Energy<br>(eV)                                       | Selected Major Transitions <sup>a</sup>                                                                                                                                                                                            |
|---------|-----------------------------------------------|--------------------------------------------------------------------|------------------------------------------------------|------------------------------------------------------------------------------------------------------------------------------------------------------------------------------------------------------------------------------------|
| 7       | 652<br>645<br>632<br>566<br>437<br>431<br>417 | 0.0192<br>0.0670<br>0.2123<br>0.0747<br>0.7444<br>0.0102<br>0.0374 | 1.62<br>1.76<br>1.96<br>2.19<br>2.83<br>2.88<br>2.97 | H $\rightarrow$ L (81%)<br>H $\rightarrow$ L+2 (55%)<br>H $\rightarrow$ L+3 (78%)<br>H $\rightarrow$ L+5 (62%)<br>H-1 $\rightarrow$ L+1 (79%)<br>H $\rightarrow$ L+7 (42%), H $\rightarrow$ L+8 (36%)<br>H $\rightarrow$ L+9 (52%) |
| 9a      | 690<br>609<br>436                             | 0.0902<br>0.2488<br>0.7907                                         | 1.80<br>2.03<br>2.84                                 | H $\rightarrow$ L+2 (82%)<br>H $\rightarrow$ L+4 (87%)<br>H-1 $\rightarrow$ L+1 (83%)                                                                                                                                              |
| 9b      | 673<br>595<br>527<br>437                      | 0.1723<br>0.1856<br>0.0251<br>0.8118                               | 1.84<br>2.08<br>2.35<br>2.83                         | H $\rightarrow$ L+3 (79%)<br>H $\rightarrow$ L+4 (89%)<br>H $\rightarrow$ L+5 (80%)<br>H-1 $\rightarrow$ L (83%)                                                                                                                   |
| 9c      | 692<br>636<br>584<br>437<br>335               | 0.0576<br>0.1888<br>0.1118<br>0.7972<br>0.0412                     | 1.79<br>1.95<br>2.12<br>2.83<br>3.70                 | H $\rightarrow$ L+1 (40%), H $\rightarrow$ L+2 (59%)<br>H $\rightarrow$ L+3 (87%)<br>H $\rightarrow$ L+4 (89%)<br>H-1 $\rightarrow$ L (84%)<br>H-4 $\rightarrow$ L (42%)                                                           |
| 9a+MeOH | 434<br>367<br>309<br>306<br>301<br>293        | 0.5709<br>0.0171<br>0.0771<br>0.0641<br>0.0349<br>0.0204           | 2.85<br>3.38<br>4.01<br>4.05<br>4.11<br>4.22         | H $\rightarrow$ L (99%)<br>H-1 $\rightarrow$ L (97%)<br>H-1 $\rightarrow$ L+1 (85%)<br>H-2 $\rightarrow$ L (61%)<br>H-1 $\rightarrow$ L+1 (69%)<br>H-5 $\rightarrow$ L (46%)                                                       |

**Table-S1** Major transition achieved from TDDFT calculation with B3LYP/6-31G\* level of theory

| Orbitals | 7                                                                                   | 9a                                                                                   | 9b                                                                                    |
|----------|-------------------------------------------------------------------------------------|--------------------------------------------------------------------------------------|---------------------------------------------------------------------------------------|
| HOMO-3   |                                                                                     | 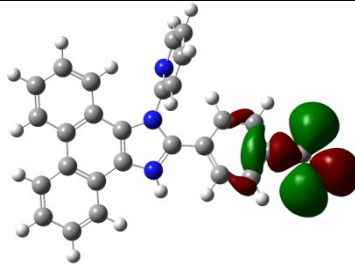   |    |
| HOMO-2   |    |    |    |
| HOMO-1   |   |   |   |
| HOMO     |  |  |  |
| LUMO     |  |  |  |



|            |  |  |  |
|------------|--|--|--|
| LUMO+<br>1 |  |  |  |
| LUMO+<br>2 |  |  |  |
| LUMO+<br>3 |  |  |  |

| Orbitals | 9c | 7+MeOH | 9a+MeOH |
|----------|----|--------|---------|
| HOMO-3   |    |        |         |

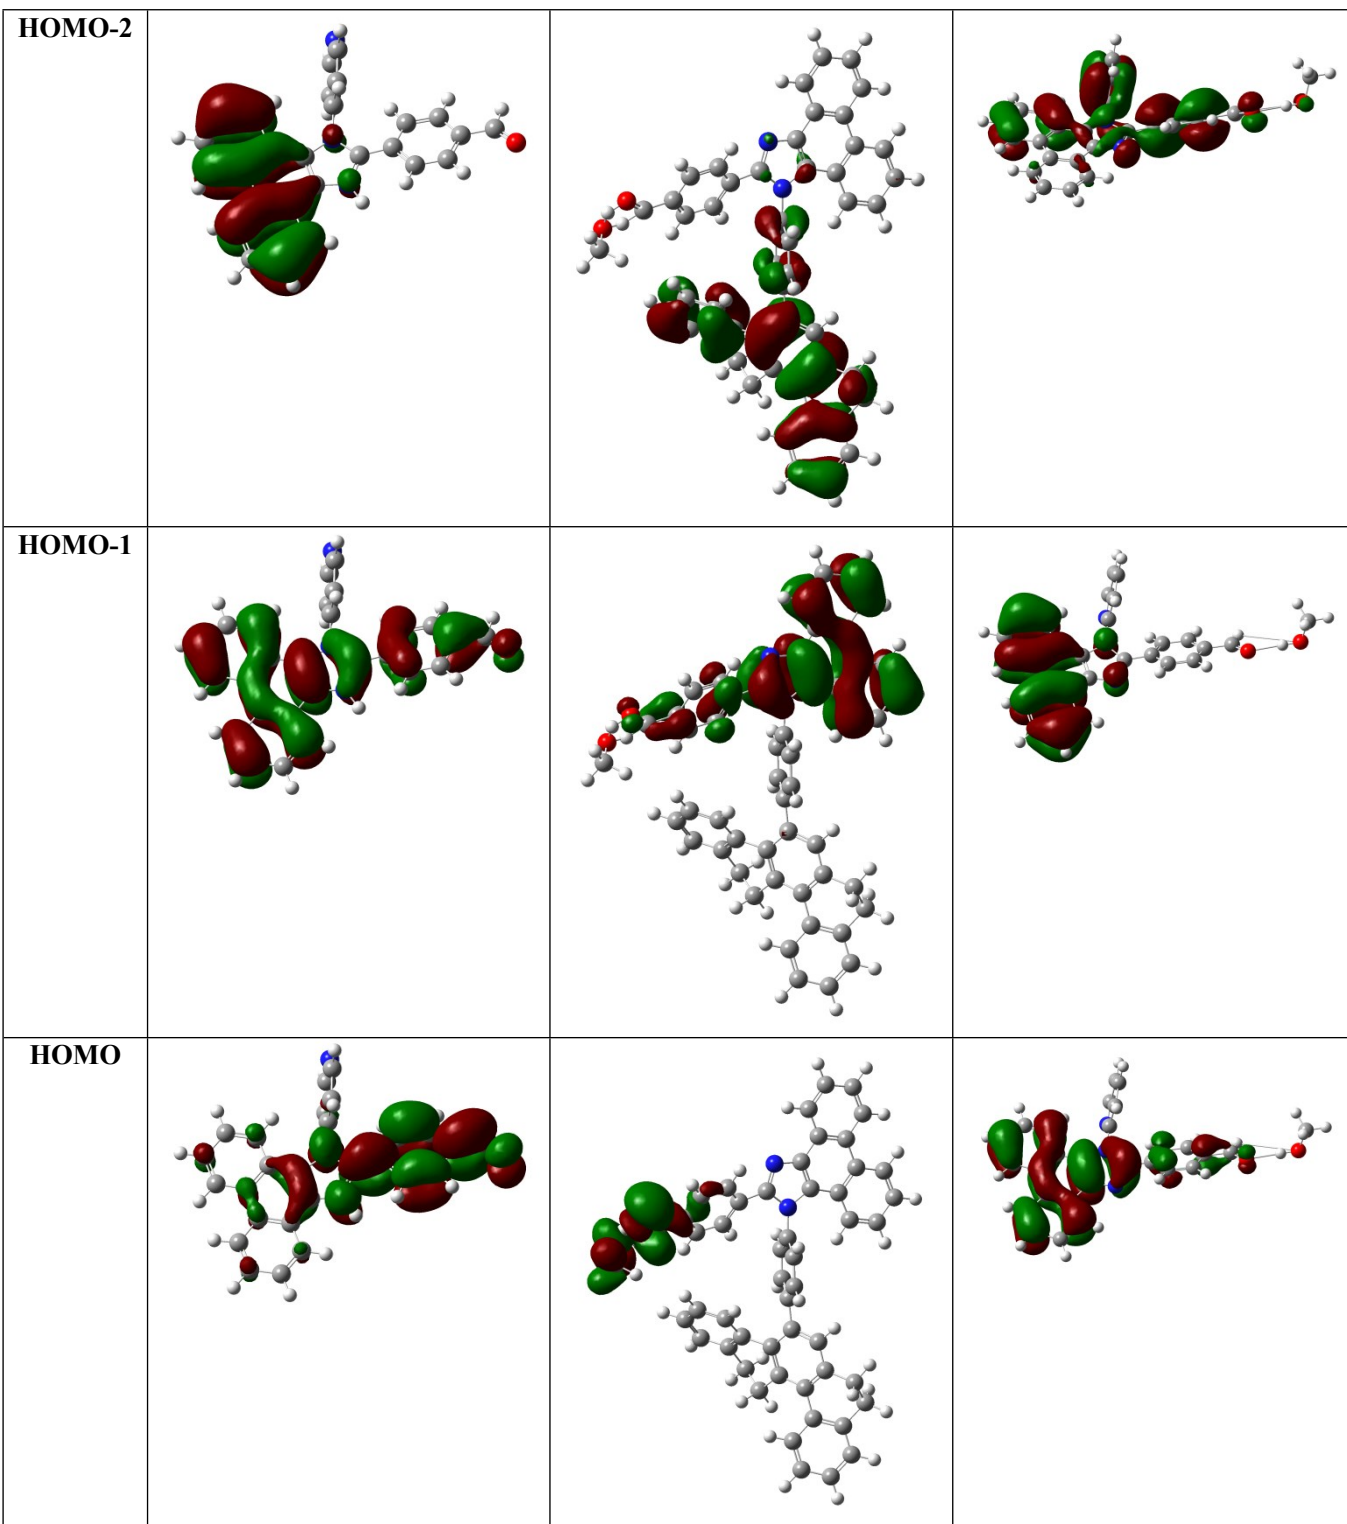



|            |                                                                                     |                                                                                      |                                                                                       |
|------------|-------------------------------------------------------------------------------------|--------------------------------------------------------------------------------------|---------------------------------------------------------------------------------------|
| LUMO       | 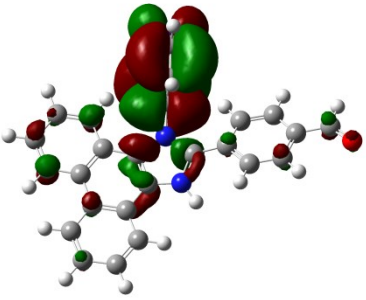   |    |    |
| LUMO+<br>1 |    |   |    |
| LUMO+<br>2 |  |  |  |

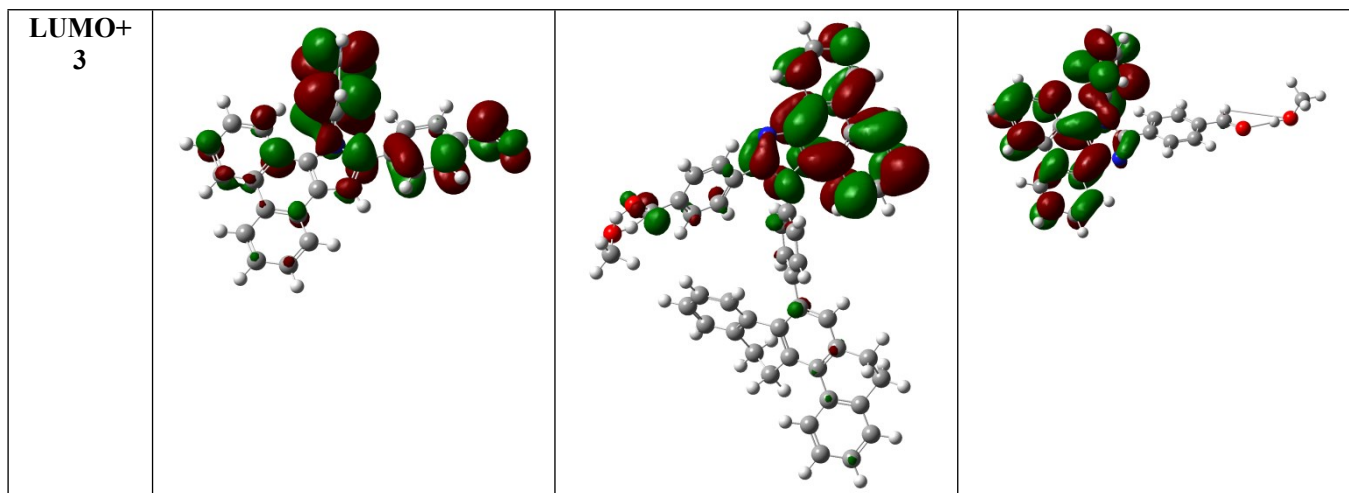

**Table-S2** Density surfaces of the frontier orbitals involved in electronic transitions of chromophores 7, 9a-c , 7+MeOH and 9a+MeOH which is derived from B3LYP/6-31+G\*\* level of theory.

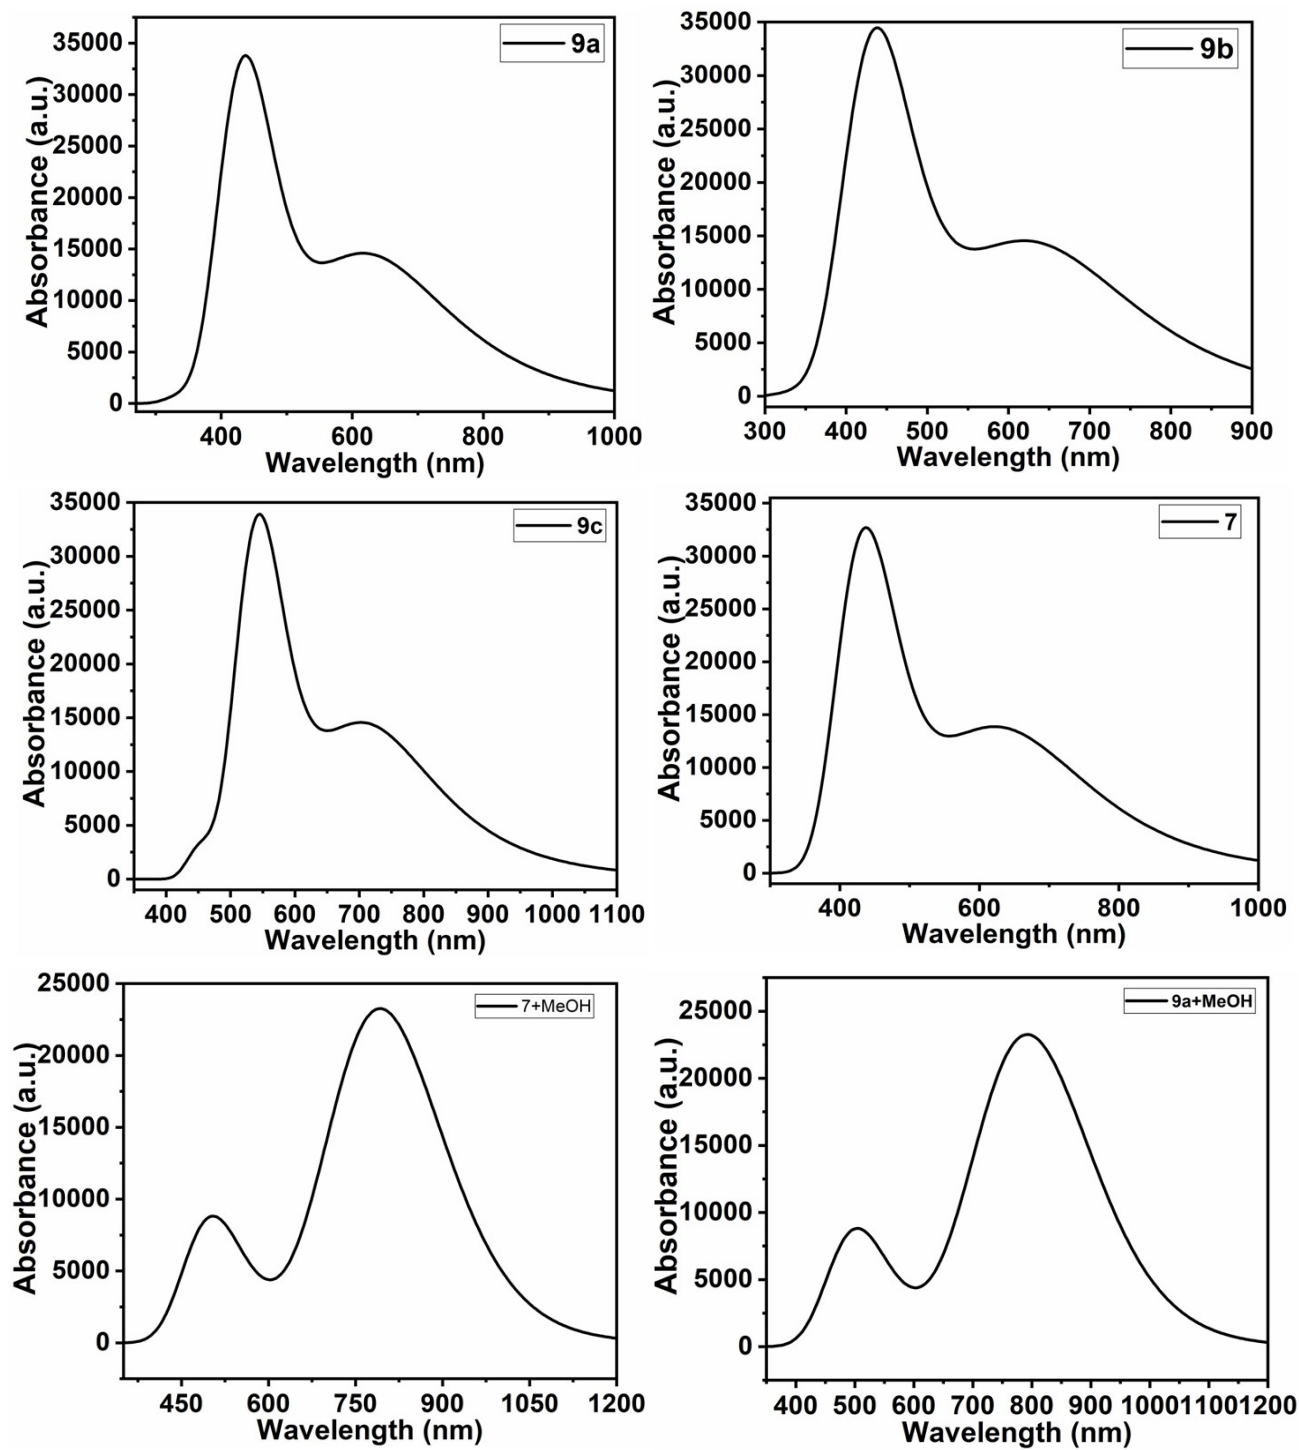

**Figure-S22** Theoretically calculated absorption spectra of fluorophore compound 7, 9a-c, 7+MeOH and 9a+MeOH.

| 7 ( in Acetonitrile solvent medium) |          |          |          | 9a ( in Acetonitrile solvent medium) |          |          |          | 9b (in Acetonitrile solvent medium) |          |          |          |
|-------------------------------------|----------|----------|----------|--------------------------------------|----------|----------|----------|-------------------------------------|----------|----------|----------|
| C                                   | 9.56746  | -1.85386 | -0.96453 | C                                    | -1.58974 | 4.3799   | -0.49069 | C                                   | -1.52895 | 4.4485   | -0.24502 |
| C                                   | 8.55845  | -2.81319 | -1.09019 | C                                    | -1.44393 | 3.53762  | -1.59338 | C                                   | -1.43284 | 3.68532  | -1.41146 |
| C                                   | 7.21222  | -2.47139 | -0.92768 | C                                    | -0.95898 | 2.24379  | -1.39319 | C                                   | -0.96908 | 2.37387  | -1.31696 |
| C                                   | 6.85649  | -1.13863 | -0.60043 | C                                    | -0.64803 | 1.86182  | -0.0886  | C                                   | -0.62644 | 1.89018  | -0.05406 |
| C                                   | 7.88049  | -0.17579 | -0.52906 | N                                    | -0.78177 | 2.64957  | 0.97955  | C                                   | -0.75945 | 2.72517  | 1.05963  |
| C                                   | 9.2214   | -0.52627 | -0.70243 | C                                    | -1.24416 | 3.89247  | 0.77232  | N                                   | -1.19946 | 3.98622  | 0.97257  |
| C                                   | 6.10654  | -3.47385 | -1.16417 | N                                    | -0.14677 | 0.53269  | 0.15243  | N                                   | -0.14191 | 0.55019  | 0.1099   |
| C                                   | 4.97582  | -2.78406 | -1.94097 | C                                    | 1.21215  | 0.14453  | 0.11632  | C                                   | 1.21369  | 0.14588  | 0.06784  |
| C                                   | 4.48359  | -1.58418 | -1.16225 | C                                    | 1.22834  | -1.23136 | 0.04107  | C                                   | 1.21238  | -1.2314  | 0.02633  |
| C                                   | 5.41289  | -0.80324 | -0.43286 | N                                    | -0.08404 | -1.6645  | 0.01955  | N                                   | -0.10368 | -1.6487  | 0.01751  |
| C                                   | 3.1277   | -1.28601 | -1.09299 | C                                    | -0.94692 | -0.60196 | 0.10072  | C                                   | -0.95788 | -0.57705 | 0.07632  |
| C                                   | 2.63301  | -0.21209 | -0.33768 | C                                    | 2.4294   | 0.90987  | 0.14312  | C                                   | 2.44316  | 0.89438  | 0.06266  |
| C                                   | 3.5495   | 0.58007  | 0.3962   | C                                    | 3.65916  | 0.16683  | 0.08155  | C                                   | 3.66215  | 0.13018  | 0.04077  |
| C                                   | 4.92662  | 0.22364  | 0.41041  | C                                    | 3.65741  | -1.29663 | 0.0046   | C                                   | 3.6396   | -1.33475 | 0.01491  |
| C                                   | 3.14925  | 1.80524  | 1.14722  | C                                    | 2.42229  | -2.01157 | -0.0162  | C                                   | 2.39429  | -2.03081 | -0.00144 |
| C                                   | 3.85208  | 2.13518  | 2.32741  | C                                    | 2.47999  | 2.32309  | 0.2321   | C                                   | 2.51977  | 2.30949  | 0.07523  |
| C                                   | 5.01638  | 1.25606  | 2.70091  | C                                    | 3.68792  | 2.99808  | 0.25148  | C                                   | 3.73856  | 2.96492  | 0.07409  |
| C                                   | 5.81105  | 0.92853  | 1.42792  | C                                    | 4.89449  | 2.28057  | 0.18271  | C                                   | 4.93328  | 2.22553  | 0.05763  |
| C                                   | 2.15424  | 2.68725  | 0.68963  | C                                    | 4.87062  | 0.89817  | 0.10224  | C                                   | 4.88545  | 0.84166  | 0.03988  |
| C                                   | 1.81968  | 3.83218  | 1.41551  | C                                    | 4.8475   | -2.06222 | -0.05389 | C                                   | 4.81817  | -2.11997 | -0.00137 |
| C                                   | 2.48118  | 4.1223   | 2.61247  | C                                    | 4.81996  | -3.44582 | -0.13164 | C                                   | 4.76974  | -3.50465 | -0.03793 |
| C                                   | 3.50363  | 3.27802  | 3.05417  | C                                    | 3.59225  | -4.13502 | -0.15681 | C                                   | 3.53176  | -4.17535 | -0.06175 |
| C                                   | 1.14723  | -0.07474 | -0.27434 | C                                    | 2.40753  | -3.42313 | -0.09965 | C                                   | 2.35785  | -3.44384 | -0.04348 |
| C                                   | 0.46796  | -0.05751 | 0.95815  | C                                    | -2.3607  | -0.72246 | 0.12111  | C                                   | -2.37284 | -0.69805 | 0.08192  |
| C                                   | -0.92405 | -0.03491 | 1.01122  | C                                    | -2.96621 | -1.94861 | -0.3238  | C                                   | -2.96134 | -1.94878 | -0.31997 |
| C                                   | -1.66229 | -0.04051 | -0.17647 | C                                    | -4.32755 | -2.13223 | -0.29345 | C                                   | -4.32013 | -2.14969 | -0.29867 |
| C                                   | -1.01316 | -0.05374 | -1.4113  | C                                    | -5.20354 | -1.11291 | 0.18874  | C                                   | -5.21551 | -1.12383 | 0.1292   |
| C                                   | 0.38226  | -0.06784 | -1.45405 | C                                    | -4.60644 | 0.10069  | 0.63731  | C                                   | -4.63933 | 0.11606  | 0.52783  |
| N                                   | -3.09874 | -0.05957 | -0.12274 | C                                    | -3.24419 | 0.2983   | 0.60747  | C                                   | -3.27928 | 0.33043  | 0.50715  |
| C                                   | -3.90162 | -1.20427 | 0.06997  | C                                    | -6.62826 | -1.28278 | 0.23099  | C                                   | -6.63873 | -1.31167 | 0.16301  |
| C                                   | -5.21305 | -0.78691 | -0.01754 | O                                    | -7.26132 | -2.30277 | -0.13151 | O                                   | -7.25265 | -2.35528 | -0.16006 |
| N                                   | -5.1997  | 0.56622  | -0.28253 | H                                    | -1.96152 | 5.39274  | -0.60045 | H                                   | -1.88559 | 5.47417  | -0.28871 |
| C                                   | -3.91406 | 1.04236  | -0.34395 | H                                    | -1.69774 | 3.87855  | -2.59177 | H                                   | -1.71199 | 4.11105  | -2.3691  |
| C                                   | -3.5713  | -2.58922 | 0.28744  | H                                    | -0.82311 | 1.55181  | -2.21672 | H                                   | -0.87291 | 1.74134  | -2.19344 |
| C                                   | -4.67534 | -3.49388 | 0.46938  | H                                    | -1.34264 | 4.51908  | 1.65443  | H                                   | -0.49759 | 2.35538  | 2.04812  |
| C                                   | -6.06137 | -3.02061 | 0.42139  | H                                    | -0.38056 | -2.62192 | 0.13474  | H                                   | -0.40921 | -2.6014  | 0.14477  |
| C                                   | -6.33929 | -1.64574 | 0.15874  | H                                    | 1.56506  | 2.8927   | 0.29965  | H                                   | 1.61575  | 2.89948  | 0.08261  |
| C                                   | -2.25024 | -3.10267 | 0.31391  | H                                    | 3.69748  | 4.08134  | 0.32245  | H                                   | 3.76479  | 4.05016  | 0.08421  |
| C                                   | -2.0058  | -4.44862 | 0.52413  | H                                    | 5.84525  | 2.80433  | 0.19625  | H                                   | 5.89278  | 2.73321  | 0.05623  |
| C                                   | -3.07818 | -5.33643 | 0.71431  | H                                    | 5.8162   | 0.37246  | 0.05607  | H                                   | 5.82199  | 0.29833  | 0.02326  |
| C                                   | -4.37844 | -4.86105 | 0.68288  | H                                    | 5.81227  | -1.57048 | -0.03989 | H                                   | 5.7903   | -1.64312 | 0.01391  |
| C                                   | -7.17153 | -3.87755 | 0.61931  | H                                    | 5.75318  | -3.99877 | -0.17501 | H                                   | 5.69457  | -4.07304 | -0.0497  |
| C                                   | -8.4743  | -3.40822 | 0.555    | H                                    | 3.57386  | -5.21835 | -0.22146 | H                                   | 3.4972   | -5.25971 | -0.09425 |
| C                                   | -8.73106 | -2.04946 | 0.28818  | H                                    | 1.46224  | -3.95626 | -0.12404 | H                                   | 1.40458  | -3.96295 | -0.06445 |
| C                                   | -7.67317 | -1.17936 | 0.09336  | H                                    | -2.34768 | -2.74113 | -0.73507 | H                                   | -2.33119 | -2.75095 | -0.69231 |
| C                                   | -3.59547 | 2.40352  | -0.60175 | H                                    | -4.75589 | -3.06215 | -0.65444 | H                                   | -4.73096 | -3.09967 | -0.62625 |
| C                                   | -2.32144 | 3.01189  | -0.34317 | H                                    | -5.24615 | 0.88898  | 1.02814  | H                                   | -5.2934  | 0.91491  | 0.87036  |
| C                                   | -2.11239 | 4.35172  | -0.58315 | H                                    | -2.84309 | 1.224    | 0.99806  | H                                   | -2.90311 | 1.28378  | 0.8501   |
| C                                   | -3.13413 | 5.19993  | -1.09928 | H                                    | -7.19091 | -0.41321 | 0.6253   | H                                   | -7.21769 | -0.43316 | 0.51141  |
| C                                   | -4.40108 | 4.59883  | -1.36597 |                                      |          |          |          |                                     |          |          |          |
| C                                   | -4.62267 | 3.26442  | -1.12719 |                                      |          |          |          |                                     |          |          |          |
| C                                   | -2.87828 | 6.59172  | -1.3369  |                                      |          |          |          |                                     |          |          |          |
| O                                   | -3.69782 | 7.42663  | -1.78985 |                                      |          |          |          |                                     |          |          |          |
| H                                   | 10.60803 | -2.13594 | -1.09638 |                                      |          |          |          |                                     |          |          |          |

|   |          |          |          |
|---|----------|----------|----------|
| H | 8.81637  | -3.84054 | -1.33531 |
| H | 7.63318  | 0.86576  | -0.36342 |
| H | 9.98911  | 0.23963  | -0.64164 |
| H | 5.71021  | -3.84462 | -0.20753 |
| H | 6.49008  | -4.33862 | -1.71371 |
| H | 4.14723  | -3.47424 | -2.12578 |
| H | 5.35938  | -2.46813 | -2.92255 |
| H | 2.42323  | -1.93033 | -1.61165 |
| H | 4.66586  | 0.31976  | 3.15909  |
| H | 5.65809  | 1.75625  | 3.43253  |
| H | 6.66487  | 0.29587  | 1.67796  |
| H | 6.21589  | 1.86606  | 1.02005  |
| H | 1.64362  | 2.48741  | -0.24567 |
| H | 1.04992  | 4.5008   | 1.04218  |
| H | 2.22108  | 5.00947  | 3.18261  |
| H | 4.05076  | 3.51636  | 3.96297  |
| H | 1.03399  | -0.07518 | 1.88346  |
| H | -1.43885 | -0.03056 | 1.96669  |
| H | -1.59324 | -0.05632 | -2.32852 |
| H | 0.8824   | -0.07454 | -2.41744 |
| H | -6.01242 | 1.16215  | -0.30021 |
| H | -1.4117  | -2.43949 | 0.16313  |
| H | -0.98319 | -4.81299 | 0.53795  |
| H | -2.89314 | -6.39332 | 0.87939  |
| H | -5.18522 | -5.57003 | 0.8215   |
| H | -7.01694 | -4.92863 | 0.82926  |
| H | -9.2999  | -4.09543 | 0.71281  |
| H | -9.75218 | -1.68492 | 0.23777  |
| H | -7.87476 | -0.1315  | -0.10758 |
| H | -1.51172 | 2.42819  | 0.0711   |
| H | -1.13684 | 4.77983  | -0.36478 |
| H | -1.19589 | 5.21207  | -1.77908 |
| H | -5.59479 | 2.85699  | -1.38753 |
| H | -1.85139 | 6.92685  | -1.08941 |

| 9c ( in Acetonitrile solvent medium) | 7+MeOH ( in Acetonitrile solvent medium) | 9a+MeOH (in Acetonitrile solvent medium) |          |   |         |         |         |   |          |          |          |
|--------------------------------------|------------------------------------------|------------------------------------------|----------|---|---------|---------|---------|---|----------|----------|----------|
| N                                    | -1.60665                                 | 4.48239                                  | -0.39019 | C | 2.9934  | 0.6121  | 2.708   | C | 0.48349  | 4.5537   | 0.1437   |
| C                                    | -1.22865                                 | 4.03471                                  | 0.81762  | C | 2.6129  | 1.2441  | 1.5112  | C | 0.01559  | 3.97403  | -1.03851 |
| C                                    | -0.73928                                 | 2.74711                                  | 1.04533  | C | 1.3468  | 0.9802  | 0.9349  | N | -0.37969 | 2.69455  | -1.12475 |
| C                                    | -0.6349                                  | 1.88481                                  | -0.04648 | C | 0.4895  | 0.0006  | 1.5125  | C | -0.3219  | 1.96075  | -0.01114 |
| C                                    | -1.02202                                 | 2.32829                                  | -1.30997 | C | 0.8589  | -0.5485 | 2.7661  | C | 0.12361  | 2.43626  | 1.22215  |
| C                                    | -1.50135                                 | 3.63568                                  | -1.42558 | C | 2.1057  | -0.2663 | 3.3478  | C | 0.53884  | 3.76743  | 1.29475  |
| N                                    | -0.13964                                 | 0.54759                                  | 0.12529  | C | 0.8789  | 1.7295  | -0.2645 | N | -0.74824 | 0.59152  | -0.12689 |
| C                                    | 1.21842                                  | 0.14917                                  | 0.08241  | C | -0.6616 | 1.9417  | -0.2308 | C | -2.05269 | 0.10159  | -0.06032 |
| C                                    | 1.22104                                  | -1.22787                                 | 0.02693  | C | -1.3833 | 0.6706  | 0.0801  | C | -1.91656 | -1.28383 | -0.07858 |
| N                                    | -0.09333                                 | -1.65002                                 | 0.00786  | C | -0.7502 | -0.3359 | 0.8582  | N | -0.59631 | -1.64837 | -0.14134 |
| C                                    | -0.95112                                 | -0.58187                                 | 0.07743  | C | -2.6816 | 0.4574  | -0.4277 | C | 0.0894   | -0.51741 | -0.17268 |
| C                                    | 2.44605                                  | 0.90091                                  | 0.07929  | C | -3.3907 | -0.7437 | -0.189  | C | -3.33187 | 0.75522  | 0.04622  |
| C                                    | 3.66713                                  | 0.14012                                  | 0.05299  | C | -2.7386 | -1.7702 | 0.5588  | C | -4.48218 | -0.10286 | 0.10908  |
| C                                    | 3.6488                                   | -1.32456                                 | 0.01817  | C | -1.3598 | -1.6224 | 0.9077  | C | -4.34479 | -1.56681 | 0.05772  |
| C                                    | 2.4054                                   | -2.02356                                 | -0.00669 | C | -3.3772 | -2.9815 | 1.0034  | C | -3.05351 | -2.16181 | -0.03272 |
| C                                    | 2.5187                                   | 2.31601                                  | 0.09358  | C | -2.6204 | -4.1866 | 1.0317  | C | -3.5106  | 2.15847  | 0.09605  |
| C                                    | 3.73565                                  | 2.97483                                  | 0.0931   | C | -1.2054 | -4.1293 | 0.5888  | C | -4.77225 | 2.719    | 0.20916  |
| C                                    | 4.93246                                  | 2.23894                                  | 0.07516  | C | -0.5652 | -2.8632 | 1.2181  | C | -5.90227 | 1.88796  | 0.27578  |
| C                                    | 4.88844                                  | 0.85501                                  | 0.05384  | C | -4.69   | -2.9975 | 1.5342  | C | -5.75124 | 0.51073  | 0.22569  |
| C                                    | 4.82948                                  | -2.1066                                  | -0.00106 | C | -5.2517 | -4.1881 | 2.0283  | C | -5.46007 | -2.43891 | 0.09617  |
| C                                    | 4.78457                                  | -3.49103                                 | -0.0491  | C | -4.499  | -5.3748 | 2.0384  | C | -5.3066  | -3.81708 | 0.05259  |
| C                                    | 3.54838                                  | -4.16459                                 | -0.08254 | C | -3.1845 | -5.3765 | 1.5418  | C | -4.02307 | -4.38851 | -0.03197 |

|   |          |          |          |   |          |         |         |   |          |          |          |
|---|----------|----------|----------|---|----------|---------|---------|---|----------|----------|----------|
| C | 2.37261  | -3.43624 | -0.06117 | C | -4.6909  | -0.8892 | -0.7821 | C | -2.90999 | -3.56532 | -0.07481 |
| C | -2.36544 | -0.70592 | 0.08995  | C | -5.0211  | -2.0272 | -1.5617 | C | 1.55783  | -0.47706 | -0.25116 |
| C | -2.95512 | -1.94842 | -0.3339  | C | -6.2886  | -2.1573 | -2.1612 | C | 2.25819  | 0.49427  | -0.99002 |
| C | -4.31375 | -2.15036 | -0.30647 | C | -7.2547  | -1.1374 | -2.0242 | C | 3.64852  | 0.45535  | -1.05366 |
| C | -5.20567 | -1.13448 | 0.151    | C | -6.9393  | -0.0031 | -1.2459 | C | 4.366    | -0.55064 | -0.38672 |
| C | -4.62746 | 0.09682  | 0.57259  | C | -5.681   | 0.1128  | -0.6266 | C | 3.66743  | -1.53191 | 0.34212  |
| C | -3.26777 | 0.31283  | 0.54526  | N | -8.486   | -1.2538 | -2.6164 | C | 2.28265  | -1.49562 | 0.40635  |
| C | -6.6288  | -1.32384 | 0.1916   | C | -8.8051  | -1.1745 | -3.939  | C | 5.83097  | -0.55826 | -0.47092 |
| O | -7.24449 | -2.36023 | -0.14967 | C | -10.1784 | -1.3964 | -4.0146 | H | 6.27831  | 0.24922  | -1.08122 |
| H | -1.32233 | 4.73329  | 1.6447   | N | -10.6738 | -1.5443 | -2.7793 | O | 6.5575   | -1.38476 | 0.08075  |
| H | -0.45081 | 2.42735  | 2.04056  | C | -9.6406  | -1.456  | -1.9278 | H | 8.40713  | -1.26472 | -0.09272 |
| H | -0.95293 | 1.6807   | -2.17694 | C | -8.0669  | -0.9131 | -5.1267 | O | 9.36745  | -1.1214  | -0.20213 |
| H | -1.81063 | 4.0159   | -2.39555 | C | -8.7472  | -0.9563 | -6.3954 | C | 9.89526  | -0.62407 | 1.02689  |
| H | -0.39628 | -2.60408 | 0.1317   | C | -10.1587 | -1.2202 | -6.4485 | H | 0.7941   | 5.59271  | 0.15498  |
| H | 1.61317  | 2.90351  | 0.10424  | C | -10.8788 | -1.4397 | -5.2327 | H | -0.04171 | 4.55444  | -1.95535 |
| H | 3.75876  | 4.06015  | 0.10467  | C | -6.688   | -0.5837 | -5.0962 | H | 0.13849  | 1.78552  | 2.0891   |
| H | 5.89055  | 2.74928  | 0.07458  | C | -5.9566  | -0.362  | -6.2689 | H | 0.89418  | 4.17917  | 2.23372  |
| H | 5.8265   | 0.31436  | 0.03456  | C | -6.6     | -0.4279 | -7.5071 | H | -2.65234 | 2.81289  | 0.04059  |
| H | 5.80043  | -1.62759 | 0.02109  | C | -7.9714  | -0.7184 | -7.5667 | H | -4.88156 | 3.79859  | 0.24521  |
| H | 5.71087  | -4.05699 | -0.0627  | C | -10.9158 | -1.2692 | -7.6555 | H | -6.89466 | 2.31877  | 0.36703  |
| H | 3.51665  | -5.24873 | -0.12451 | C | -12.2957 | -1.538  | -7.6613 | H | -6.64197 | -0.10282 | 0.28197  |
| H | 1.42076  | -3.95758 | -0.08913 | C | -12.9726 | -1.7553 | -6.454  | H | -6.46475 | -2.03868 | 0.15863  |
| H | -2.32628 | -2.74095 | -0.72867 | C | -12.2695 | -1.6994 | -5.2422 | H | -6.18491 | -4.45491 | 0.08314  |
| H | -4.72715 | -3.09307 | -0.65147 | C | -9.8131  | -1.5465 | -0.5239 | H | -3.90654 | -5.46764 | -0.06565 |
| H | -5.27949 | 0.88665  | 0.93916  | C | -9.0064  | -2.4045 | 0.2578  | H | -1.91136 | -3.98431 | -0.14324 |
| H | -2.88784 | 1.25805  | 0.90711  | C | -9.1292  | -2.4247 | 1.659   | H | 1.722    | 1.26047  | -1.536   |
| H | -7.20544 | -0.45354 | 0.56367  | C | -10.0704 | -1.5963 | 2.3038  | H | 4.18171  | 1.20408  | -1.63321 |
|   |          |          |          | C | -10.9072 | -0.7689 | 1.5249  | H | 4.22309  | -2.30985 | 0.85527  |
|   |          |          |          | C | -10.7863 | -0.7511 | 0.123   | H | 1.74054  | -2.24677 | 0.96954  |
|   |          |          |          | C | -10.1581 | -1.6011 | 3.707   | H | 10.95988 | -0.43022 | 0.872    |
|   |          |          |          | H | -9.6563  | -2.0907 | 4.4309  | H | 9.41165  | 0.31449  | 1.32916  |
|   |          |          |          | O | -10.8512 | -0.9778 | 4.5537  | H | 9.78975  | -1.35299 | 1.84175  |
|   |          |          |          | O | -9.703   | -2.0779 | 5.3922  |   |          |          |          |
|   |          |          |          | H | -10.4102 | -1.4074 | 5.214   |   |          |          |          |
|   |          |          |          | C | -8.685   | -2.1564 | 6.3941  |   |          |          |          |
|   |          |          |          | H | 3.9095   | 0.8003  | 3.1211  |   |          |          |          |
|   |          |          |          | H | 3.2628   | 1.8988  | 1.0675  |   |          |          |          |
|   |          |          |          | H | 0.2173   | -1.146  | 3.2856  |   |          |          |          |
|   |          |          |          | H | 2.3653   | -0.6999 | 4.2374  |   |          |          |          |
|   |          |          |          | H | 1.3625   | 2.7083  | -0.3353 |   |          |          |          |
|   |          |          |          | H | 1.1391   | 1.1539  | -1.1563 |   |          |          |          |
|   |          |          |          | H | -0.9181  | 2.6875  | 0.5266  |   |          |          |          |
|   |          |          |          | H | -0.9659  | 2.3361  | -1.2061 |   |          |          |          |
|   |          |          |          | H | -3.1113  | 1.2001  | -0.9863 |   |          |          |          |
|   |          |          |          | H | -0.6444  | -5.0185 | 0.8873  |   |          |          |          |
|   |          |          |          | H | -1.1736  | -4.0569 | -0.5025 |   |          |          |          |
|   |          |          |          | H | -0.5     | -3.0183 | 2.2956  |   |          |          |          |
|   |          |          |          | H | 0.4471   | -2.7745 | 0.8153  |   |          |          |          |
|   |          |          |          | H | -5.2385  | -2.1379 | 1.5958  |   |          |          |          |
|   |          |          |          | H | -6.2039  | -4.1883 | 2.397   |   |          |          |          |
|   |          |          |          | H | -4.9011  | -6.234  | 2.4217  |   |          |          |          |
|   |          |          |          | H | -2.6368  | -6.241  | 1.5682  |   |          |          |          |
|   |          |          |          | H | -4.338   | -2.7745 | -1.7079 |   |          |          |          |
|   |          |          |          | H | -6.504   | -2.9948 | -2.7076 |   |          |          |          |
|   |          |          |          | H | -7.6263  | 0.7464  | -1.1284 |   |          |          |          |
|   |          |          |          | H | -5.4927  | 0.9439  | -0.06   |   |          |          |          |
|   |          |          |          | H | -6.178   | -0.473  | -4.2276 |   |          |          |          |
|   |          |          |          | H | -4.9582  | -0.1455 | -6.2164 |   |          |          |          |
|   |          |          |          | H | -6.0699  | -0.2573 | -8.3652 |   |          |          |          |
|   |          |          |          | H | -8.3758  | -0.7459 | -8.4999 |   |          |          |          |

|   |          |         |         |
|---|----------|---------|---------|
| H | -10.4913 | -1.1119 | -8.567  |
| H | -12.8088 | -1.5791 | -8.5469 |
| H | -13.9755 | -1.9552 | -6.4563 |
| H | -12.7845 | -1.8502 | -4.3703 |
| H | -8.3235  | -3.0251 | -0.1842 |
| H | -8.524   | -3.046  | 2.2013  |
| H | -11.6048 | -0.168  | 1.9708  |
| H | -11.4034 | -0.1382 | -0.4174 |
| H | -9.1401  | -2.1499 | 7.3855  |
| H | -8.0067  | -1.3069 | 6.3022  |
| H | -8.123   | -3.0812 | 6.2603  |

**Table S3** Cartesian coordinates (in Angstroms) of the optimized geometries in ground state of 7, 9a-c, 7+MeOH and 9a+MeOH in acetonitrile solvent method at B3LYP/6-31+G\*\* level

| S.No | Reported Probe | Analytical | LOD | Applications | Reference |
|------|----------------|------------|-----|--------------|-----------|
|------|----------------|------------|-----|--------------|-----------|

|          |                                                                                        | <b>methods</b> |                   |                               |                                                            |
|----------|----------------------------------------------------------------------------------------|----------------|-------------------|-------------------------------|------------------------------------------------------------|
| 1        | N,bis(5-nitro-salicylaldehyde)azine                                                    | UV, FL         | -                 | DNA studies                   | New J. Chem., 2019, 43, 8982--8992                         |
| 2        | carboxen–polydimethylsiloxane                                                          | GC             | -                 | Biodiesel                     | Bioresource Technology 99 (2008) 5901–5905                 |
| 3        | (E)-4-((4-(dimethylamino)benzylidene)amino)benzonitrile                                | UV, FL         | 9.65ppm           | -                             | Sensors and Actuators B: Chemical, 2020, 319, 128323.      |
| 4        | Pentacenequinone derivative                                                            | UV, FL         | 0.038%            | -                             | Chemical Communications, 2018, 54(60), 8339-8342.          |
| 5        | Oxoporphyrinogen-LDH                                                                   | UV             | -                 | -                             | ACS Appl. Mater. Interfaces 2013, 5, 5927–5930             |
| 6        | Ln-CPs                                                                                 | PL             | -                 | -                             | RSC Advances, 2014 4(27), 14035-14041.                     |
| 7        | (3-(((7-(diethylamino)-2-oxo-2H-chromen-3yl)methylene)amino)-2-thioxothiazolidin-4-one | UV,FL          | Upto 5%           | Bio-Imaging                   | Organic & biomolecular chemistry, 2015, 13(33), 8822-8826. |
| <b>8</b> | <b>Imidazole based</b>                                                                 | <b>UV,FL</b>   | <b>9 to 10ppm</b> | <b>Biodiesel, Paper strip</b> | <b>Present work</b>                                        |

**Table S4** Comparison table of imidazole-based probe for detection of methanol in previous and present reports
